# Supplementary material for: Screening for coronary artery disease in patients with type 2 diabetes: a meta-analysis and trial sequential analysis
Source: PubMed Central journal article supplement — BMJ Open. 2017 May 9;7(5):e015089. doi: 10.1136/bmjopen-2016-015089 (PMC5623378; doi:10.1136/bmjopen-2016-015089), 2017-05-09
Supplement: bmjopen-2016-015089.draft_revisions.pdf [file bmjopen-2016-015089.draft_revisions.pdf]

# BMJ Open

## Screening for Coronary Artery Disease in type 2 Diabetic Patients: A Meta-analysis and Trial Sequential Analysis

|                                 |                                                                                                                                                                                                                                                                                                                                                |
|---------------------------------|------------------------------------------------------------------------------------------------------------------------------------------------------------------------------------------------------------------------------------------------------------------------------------------------------------------------------------------------|
| Journal:                        | <i>BMJ Open</i>                                                                                                                                                                                                                                                                                                                                |
| Manuscript ID                   | bmjopen-2016-015089                                                                                                                                                                                                                                                                                                                            |
| Article Type:                   | Research                                                                                                                                                                                                                                                                                                                                       |
| Date Submitted by the Author:   | 07-Nov-2016                                                                                                                                                                                                                                                                                                                                    |
| Complete List of Authors:       | Rados, Dimitris; Hospital de Clinicas de Porto Alegre, Division of Endocrinology<br>Catani Pinto, Lana; Hospital de Clinicas de Porto Alegre, Division of Endocrinology<br>Leitão, Cristiane; Hospital de Clinicas de Porto Alegre, Division of Endocrinology<br>Gross, Jorge; Hospital de Clinicas de Porto Alegre, Division of Endocrinology |
| <b>Primary Subject Heading</b>: | Diabetes and endocrinology                                                                                                                                                                                                                                                                                                                     |
| Secondary Subject Heading:      | Cardiovascular medicine, Epidemiology                                                                                                                                                                                                                                                                                                          |
| Keywords:                       | meta-analysis, trial sequential analysis, Cardiovascular disease screening, type 2 diabetes, systematic review                                                                                                                                                                                                                                 |
|                                 |                                                                                                                                                                                                                                                                                                                                                |

SCHOLARONE™  
Manuscripts

1  
2  
3 **Screening for Coronary Artery Disease in type 2 Diabetic Patients: A Meta-**  
4 **analysis and Trial Sequential Analysis**  
5  
6

7  
8  
9 Dimitris Varvaki Rados<sup>1</sup>, Lana Catani Pinto<sup>1</sup>, Cristiane Bauermann Leitão<sup>1</sup>, Jorge Luiz  
10 Gross<sup>1</sup>  
11  
12

13  
14  
15  
16 Division of Endocrinology, Hospital de Clínicas de Porto Alegre/Universidade Federal  
17 do Rio Grande do Sul, Ramiro Barcelos St, 2350, Prédio 12, 4<sup>o</sup> floor, ZIP 90035-903,  
18  
19 Porto Alegre, Brazil  
20  
21

22  
23 Correspondence to: Dimitris Varvaki Rados, [dvarvaki@gmail.com](mailto:dvarvaki@gmail.com)  
24  
25

26  
27 Dimitris Varvaki Rados, MD  
28

29 Lana Catani Pinto, MD  
30

31 Cristiane Bauermann Leitão, PhD  
32

33 Jorge Luiz Gross, PhD  
34  
35  
36  
37

38 **Word count:** 2423 words  
39  
40  
41  
42  
43  
44  
45  
46  
47  
48  
49  
50  
51  
52  
53  
54  
55  
56  
57  
58  
59  
60

**STRUCTURED ABSTRACT (252)**

**Objective:** Evaluate the efficacy of coronary artery disease screening in asymptomatic patients with type 2 diabetes and assess the statistical reliability of the findings.

**Methods:** Electronic databases (MEDLINE, EMBASE, Cochrane Library and clinicaltrials.org) were reviewed up to July 2016. Randomized controlled trials evaluating coronary artery disease screening in asymptomatic type 2 diabetic patients and reporting cardiovascular events and/or mortality were included. Data was summarized with Mantel-Haenszel relative risk. Trial sequential analysis (TSA) was used to evaluate the optimal sample size to detect a 40% reduction in outcomes. Main outcomes were all-cause mortality and cardiac events (non-fatal myocardial infarction and cardiovascular death); secondary outcomes were non-fatal myocardial infarction, myocardial revascularizations and heart failure. PROSPERO: CRD42015026627.

**Results:** One hundred thirty-five references were identified and 5 studies fulfilled the inclusion criteria and totalized 3315 patients, 117 all-cause deaths and 100 cardiac events. Screening for coronary artery disease was not associated with decrease in risk for all-cause deaths all-cause deaths (RR 0.95 [95% CI 0.66 to 1.35]) or cardiac events (RR 0.72 [95% CI 0.49 to 1.06]). TSA shows that futility boundaries were reached for all-cause mortality and a relative risk reduction of 40% between treatments could be discarded. However, there is not enough information for firm conclusions for cardiac events. For secondary outcomes no benefit or harm was identified; optimal sample sizes were not reached.

**Conclusion:** Current available data do not support screening type 2 diabetic patients for coronary artery for preventing fatal events. Further studies are needed to assess the effects on cardiac events.

1  
2  
3  
4  
5  
6  
7  
8  
9  
10  
11  
12  
13  
14  
15  
16  
17  
18  
19  
20  
21  
22  
23  
24  
25  
26  
27  
28  
29  
30  
31  
32  
33  
34  
35  
36  
37  
38  
39  
40  
41  
42  
43  
44  
45  
46  
47  
48  
49  
50  
51  
52  
53  
54  
55  
56  
57  
58  
59  
60

**KEYWORDS:** Cardiovascular disease screening; type 2 diabetes; systematic review; meta-analysis; trial sequential analysis.

For peer review only

## ARTICLE SUMMARY

### Strengths and limitations of this study

- Electronic databases were reviewed to identify randomized controlled trials evaluating screening for coronary artery disease in type 2 diabetes.
- Results from individual studies were combined and summarized with Mantel-Haenszel relative risk.
- Trial sequential analysis was used to assess the optimal sample size for the outcomes.
- The results should be interpreted with caution as different screening methods were combined.

## INTRODUCTION

Diabetes mellitus is a well-known risk factor for atherosclerosis and asymptomatic coronary disease is frequent and associated with increased mortality.<sup>1</sup> Intensive medical treatment with antiplatelet agents, statins, as well as blood pressure and glycaemic control decrease the number of cardiovascular events in patients with established coronary artery disease.<sup>2</sup> It is expected that early detection and treatment of myocardial ischemia would lead to similar benefits.

Coronary artery bypass grafting reduces mortality by 40% in patients with diabetes and established multivessel coronary disease.<sup>3</sup> However, percutaneous coronary intervention (PCI) does not appear to influence mortality in patients with asymptomatic and stable coronary artery disease (with or without diabetes) when compared to intensive medical therapy alone.<sup>4</sup> BARI 2D study results showed no benefit of early revascularization in patients with type 2 diabetes. On the other hand, it suggested that coronary artery bypass grafting (CABG) might be better than medical therapy alone, but this finding must be interpreted with caution, as the allocation to PCI or CABG was not randomized.<sup>5</sup> Moreover, patients with diabetes and high-risk coronary lesions do benefit from CABG.<sup>3</sup> In summary, the goal of a screening strategy for coronary artery disease in type 2 diabetic patients would be the identification of subjects with high-risk coronary lesions (multivessel), who would be eligible for CABG and might benefit from this intervention by reducing coronary events and mortality.

Some trials directly evaluated the effects of screening for coronary artery disease vs. usual care and found no benefit for mortality or coronary events.<sup>6,7</sup> These trials were performed with adequate designs but in most cases have limited conclusions due to lack of power.<sup>6,7</sup> Meta-analysis is a valuable tool in this situation, as it combines studies in a

1  
2  
3 single analysis, which increases the sample size. Furthermore, trial sequential analysis  
4  
5 (TSA) enables the assessment of sample size power and the need for further studies.<sup>8 9</sup>  
6  
7 Therefore, our objective was to assess the efficacy of screening for asymptomatic  
8  
9 coronary artery disease in type 2 diabetic patients compared to no screening in reducing  
10  
11 cardiac events (non-fatal myocardial infarction and cardiovascular mortality) and all-  
12  
13 cause mortality. Furthermore, we aimed to evaluate the statistical reliability (sample  
14  
15 size power) of the results.  
16  
17  
18  
19

## 20 21 **RESEARCH DESIGN AND METHODS**

22  
23 This study follows the PRISMA statement for reporting systematic reviews and meta-  
24  
25 analysis.<sup>10</sup> The present review was registered in the PROSPERO registry under number  
26  
27 CRD42015026627.  
28

29  
30 To perform the present study, we searched for randomized controlled trials evaluating  
31  
32 the effects of screening for coronary artery disease in type 2 diabetic patients reporting  
33  
34 any of the outcomes of interest, which were non-fatal myocardial infarction,  
35  
36 cardiovascular and all-cause mortality, myocardial revascularizations and heart failure  
37  
38 events. Pubmed, EMBASE, Cochrane library and clinicaltrials.org databases were  
39  
40 searched from inception through July 2016 using the following terms: type 2 diabetes,  
41  
42 screening of coronary heart disease and randomized clinical trial. No restrictions were  
43  
44 made regarding study length, publication year or language. The full search terms for  
45  
46 Pubmed were: *(screening AND coronary artery disease) AND (randomized controlled*  
47  
48 *trial[Publication Type] OR randomized[Title/Abstract] OR placebo[Title/Abstract])*  
49  
50 *AND "Diabetes Mellitus, Type 2"[Mesh]*. We also searched the references lists of main  
51  
52 publications on the topic manually.  
53  
54  
55  
56  
57  
58  
59  
60

1  
2  
3 Two authors (DVR and LCP) performed the study selection independently. We  
4 included any randomized controlled trial which included type 2 diabetic patients and  
5 that evaluated the effects of any coronary artery disease screening method on the  
6 incidence of non-fatal myocardial infarction, cardiovascular or all-cause mortality. We  
7 excluded studies that were not randomized and that compared two different screening  
8 methods. Initially, titles and abstracts were reviewed for potentially eligible studies.  
9 These studies were then evaluated in full-text and those reporting any of the selected  
10 outcomes were considered for the final review and meta-analysis.

11  
12 The following information was extracted with a standardized form: first author's name;  
13 study name and year of publication; screening method; study registry; baseline HbA<sub>1c</sub>  
14 and age; number of men; number of patients in each group; follow-up time; number of  
15 events: non-fatal myocardial infarction, cardiovascular and all-cause deaths,  
16 revascularizations and heart failure events. We defined cardiac events as a composite of  
17 non-fatal myocardial infarctions and cardiovascular deaths.

18  
19 We evaluated the risk of bias at the study level with the Cochrane Collaboration tool;<sup>11</sup>  
20 for the "other bias" item we evaluated the presence of a trial registry as low risk of bias  
21 and lack of registry as high-risk. We defined no pre-specified analysis based on the risk  
22 of bias of the individual studies. The overall quality of the evidence of each meta-  
23 analysis was classified as 'high', 'moderate', 'low' or 'very low' based on the Grading  
24 of Recommendations, Assessment, Development and Evaluations (GRADE).<sup>12</sup>

25  
26 The outcomes of interest were summarized as relative risk (RR) of screening vs. no  
27 screening and they were combined using the Mantel-Haenszel RR. The heterogeneity  
28 was assessed using the Cochran Q and the I<sup>2</sup> tests (P <0.1 and I<sup>2</sup> >50% indicating high  
29 heterogeneity, respectively). We evaluated the risk of small study bias with the contour-



1  
2  
3 enhanced funnel plot and asymmetry with the Begg and Egger's tests; we considered a  
4  
5 significant small study bias if  $P < 0.1$  and, if appropriate, the trim-and-fill computation  
6  
7 was performed to evaluate the potential effect of non-published data.  
8

9  
10 One of the aims of our study was to assess the reliability of the results – that is, to  
11  
12 evaluate the ideal sample size to establish firm conclusions about the findings.<sup>9</sup> To  
13  
14 accomplish this we performed TSA of the data. Interim analysis of a single randomized  
15  
16 trial avoids type I error by creating monitoring boundaries for an estimated difference  
17  
18 between groups, so if the estimated difference is reached the trial could be terminated.  
19  
20 TSA uses a similar accurate method to create monitoring boundaries and estimate the  
21  
22 optimal sample size in meta-analyses.<sup>8,9</sup> TSA performs a cumulative meta-analysis with  
23  
24 the results of the available studies (represented by the Z-curve): as each new study is  
25  
26 included, significance is tested and confidence intervals are estimated. It also creates  
27  
28 adjusted boundaries for benefit, harm and futility and estimates the optimal sample size  
29  
30 for a given difference between treatment arms, so that a smaller estimated difference  
31  
32 would result in wider boundaries and a greater optimal sample size.<sup>8</sup> Because  
33  
34 cumulative meta-analyses may lead to false positive results due to repetitive testing, this  
35  
36 evaluation is adjusted to control for repeated analyses, while maintaining type I error at  
37  
38 5% and the power at 80%.<sup>8</sup> It is also adjusted for the variability between trials and for  
39  
40 the amount of available evidence. If one of the boundaries (benefit, risk or futility) or if  
41  
42 the optimal sample size is reached, firm conclusions might be made (for that predefined  
43  
44 difference) and further studies are deemed unnecessary; instead, if no boundaries are  
45  
46 reached, further studies are needed to settle the question.<sup>8</sup> For the present analysis, we  
47  
48 performed a TSA for a relative difference (relative risk reduction – RRR) between  
49  
50 groups of 40%. This value was chosen based on the expected benefit of  
51  
52  
53  
54  
55  
56  
57  
58  
59  
60

1  
2  
3 revascularization in the mortality rate demonstrated by previous studies.<sup>3</sup> An additional  
4  
5 TSA analysis was also performed using a RRR of 20%.

6  
7 The risk of bias graph was generated with RevMan software version 5.3 (Cochrane  
8  
9 Collaboration, Copenhagen, Denmark). The meta-analyses were performed with Stata  
10  
11 version 12.0 (Stata Inc., College Station, Texas, USA) and the TSA and graphics were  
12  
13 generated using TSA software version 0.9 [beta] (Copenhagen Trial Unit, Copenhagen,  
14  
15 Denmark).

## 16 17 18 19 **RESULTS**

20  
21 The search in electronic databases and the manual review retrieved 135 studies for the  
22  
23 evaluation of titles and abstracts. After screening, 7 studies were evaluated in full-text  
24  
25 and 5 fulfilled the inclusion and exclusion criteria.<sup>6 7 13-15</sup> The study flowchart is  
26  
27 depicted in supplementary material (Supplemental Material, Figure 1).

28  
29 The included studies comprised patients with a mean age of 61 years, with a mean  
30  
31 HbA<sub>1c</sub> of 7.6 % and the mean follow-up was 4.1 years. Additional characteristics are  
32  
33 presented in Table 1. Most studies performed screening with stress testing along with  
34  
35 electrocardiography, echocardiography or scintigraphy monitoring; one study  
36  
37 performed coronary computed tomography angiography with measurement of coronary  
38  
39 calcium. The studies totalized 3315 patients with 117 all-cause deaths and 100 cardiac  
40  
41 events.  
42  
43  
44  
45  
46  
47  
48  
49  
50  
51  
52  
53  
54  
55  
56  
57  
58  
59  
60

Table 1. Included study characteristics

| Study Name    | First author                  | Publication year | Screening method                                             | Management recommendation |
|---------------|-------------------------------|------------------|--------------------------------------------------------------|---------------------------|
| --            | Faglia E <sup>13</sup>        | 2005             | Exercise<br>electrocardiogram and<br>stress echocardiography | Yes                       |
|               |                               |                  | No screening                                                 | No                        |
| DIAD          | Young LH <sup>7</sup>         | 2009             | Stress scintigraphy                                          | No                        |
|               |                               |                  | No screening                                                 | No                        |
| DYNAMIT       | Lièvre MM <sup>14</sup>       | 2011             | Bicycle exercise test or<br>stress scintigraphy              | No                        |
|               |                               |                  | No screening                                                 | No                        |
| FACTOR-<br>64 | Muhlestein<br>JB <sup>6</sup> | 2014             | Coronary computed<br>tomography<br>angiography               | Yes                       |
|               |                               |                  | No screening                                                 | No                        |
| DADDY-D       | Turrini F <sup>15</sup>       | 2015             | Exercise<br>electrocardiogram                                | Yes                       |
|               |                               |                  | No screening                                                 | No                        |

Table 1. Included study characteristics (continued)

| Patients (n) | Age (years) | HbA1c (%) | Blood pressure (mmHg) | Smoking (%) | Statin use (%) | Aspirin use (%) | Registry |
|--------------|-------------|-----------|-----------------------|-------------|----------------|-----------------|----------|
| 71           | 58.7 ± 8.3  | 8.6 ± 2.3 | 143/85                | 46          | 28             | 9               | No       |
| 70           | 61.5 ± 8.1  | 8.4 ± 1.9 | 141/84                | 55          | 21             | 12              |          |
| 561          | 60.7 ± 6.7  | 7.2 ± 1.6 | 133/80                | 10          | 37             | 43              | Yes      |
| 562          | 60.8 ± 6.4  | 7 ± 1.5   | 132/79                | 9           | 41             | 46              |          |
| 316          | 64.1 ± 6.4  | 8.6 ± 2.2 | N.R.                  | 17          | 33             | 39              | Yes      |
| 315          | 63.7 ± 6.4  | 8.7 ± 2   | N.R.                  | 14          | 36             | 24              |          |
| 452          | 61.5 ± 7.9  | 7.4 ± 1.4 | 129/74                | 16          | 76             | 43              | Yes      |
| 448          | 61.6 ± 8.3  | 7.5 ± 1.4 | 130/74                | 15          | 72             | 40              |          |
| 262          | 61.9 ± 4.8  | 7.7 ± 1.4 | 140/81                | 40          | 39             | 29              | Yes      |
| 258          | 62 ± 5.1    | 7.8 ± 1.3 | 141/81                | 37          | 44             | 25              |          |

Data showed no difference between patients in coronary artery disease screening and control groups for all-cause death incidence (Figure 1a): RR 0.95 (95% CI 0.66 to 1.35). There was low heterogeneity ( $I^2 = 0\%$  and  $p = 0.615$ ). TSA for all-cause mortality events indicates that the futility boundary was reached, so a difference of 40% between groups is firmly discarded and no further studies are required (Figure 1b). For the RRR of 20% the optimal sample size (19548 patients) nor the futility boundary were reached. There was also no difference in cardiac events (Figure 2a): RR 0.72 (95% CI 0.49 to 1.06;  $I^2 = 38.5\%$  and  $p = 0.181$ ). For this outcome, TSA shows that the optimal sample size is 6645 patients, which is larger than the current sample. Furthermore, neither the benefit nor the futility boundaries were reached (Figure 2b). The analysis with the (RRR

of 20% showed similar results, but with a much larger optimal sample size (29763 patients).

Additional outcome analyses are presented in Table 2: the coronary artery disease screening group was similar to the control group for non-fatal myocardial infarction (RR 0.65 [95% CI 0.41 to 1.02]), heart failure (RR 0.60 [95% CI 0.33 to 1.10]) and myocardial revascularizations (PCI and CABG) (RR 1.08 [95% CI 0.83 to 1.41]). None of these outcomes reached the optimal sample size or the boundaries for futility.

Table 2. Results for myocardial infarction, revascularization and heart failure of screening versus no screening

| Outcome                         | RR (95% CI)        | Accrued Population | Optimal Sample Size (RRR = 40 %) | Optimal Sample Size (RRR = 20 %) |
|---------------------------------|--------------------|--------------------|----------------------------------|----------------------------------|
| Non-fatal Myocardial Infarction | 0.65 (0.41 - 1.02) | 3315               | 6154                             | 17495                            |
| Heart Failure                   | 0.60 (0.33 - 1.10) | 3174               | 10990                            | 49352                            |
| Revascularizations              | 1.08 (0.83 - 1.41) | 3174               | 10598                            | 47339                            |

Overall, the study quality was high according to the Cochrane Collaboration tool (Supplemental Material, Figures 2 and 3).<sup>11</sup> It must be stressed that none of the studies was blinded, but this was not considered a limitation because blinding of participants (patients and clinicians) was not feasible due to the type of intervention (screening). On the other hand, blinding of outcome assessment was reported in only one study. According to GRADE,<sup>16</sup> quality of evidence was judged as high quality for both main outcomes (all-cause mortality and cardiac events).

1  
2  
3 The funnel plot and Begg and Egger's tests showed small study bias for the cardiac  
4 events outcome, but the correction with trim-and-fill computation did not change the  
5 results; for the all-cause mortality outcome no significant risk of small study bias was  
6 identified.  
7  
8  
9  
10

## 11 12 13 **DISCUSSION**

14  
15 In the present study we identified no benefit of screening for asymptomatic coronary  
16 artery disease for all-cause mortality in patients with type 2 diabetes. This conclusion is  
17 supported by a sufficient number of patients, as shown by TSA. Although we found no  
18 benefit for the other outcomes evaluated, such as cardiovascular events, these results are  
19 not definitive, as they are not supported by an adequate number of patients, and further  
20 studies are still required.  
21  
22  
23  
24  
25  
26  
27  
28

29 A relevant point of our analysis is the trend for statistically significant difference found  
30 in cardiac events and non-fatal myocardial infarction favoring the screening group. This  
31 finding seems to be driven by the study of Faglia et al.,<sup>13</sup> which was the smallest and  
32 oldest study included in our analysis. Moreover, patients in this study had an  
33 unfavorable clinical profile, represented by the worst glycemic control, the highest  
34 blood pressure, the greatest prevalence of smoking and the lowest use of statins and  
35 aspirin in comparison with the others studies. Despite this trend, TSA shows that there  
36 is insufficient data to perform firm conclusion about cardiac events and myocardial  
37 infarction. Whether this is a real effect or not further studies are needed to firm  
38 conclusion on effects of screening for these outcomes.  
39  
40  
41  
42  
43  
44  
45  
46  
47  
48  
49  
50

51 Some limitations of this review must be acknowledged. First, the trials performed  
52 different screening tests with different specificity and sensitivity<sup>2</sup> and combining them  
53  
54  
55  
56  
57  
58  
59  
60

1  
2  
3 may be questionable. Despite this, current guidelines do not define a preferable strategy  
4  
5 for the diagnosis of coronary artery disease,<sup>2</sup> and a clinical trial support this position.<sup>17</sup>  
6  
7 Therefore, we believe these tests may be aggregated in a meta-analysis, as they all aim  
8  
9 to identify high-risk patients with greater chance to benefit from CABG.<sup>3 5 18</sup> We  
10  
11 cannot rule out the possibility that a test with higher sensitivity (coronary computed  
12  
13 tomography angiography)<sup>19</sup> would be beneficial.<sup>2</sup> However, as discussed above, the  
14  
15 potential benefit we identified in this review seems to be derived from only one study<sup>13</sup>  
16  
17 that used tests with low to moderate sensitivity.  
18  
19

20  
21 The second limitation was the somewhat choice of a relative difference of 40% between  
22  
23 treatment arms. It was based on the benefits of CABG for patients with severe coronary  
24  
25 artery disease.<sup>3</sup> Even though this evidence was published in the 90s, it is still largely  
26  
27 used by guidelines to recommend revascularization for stable coronary artery disease. In  
28  
29 addition, recent studies and meta-analysis have shown that CABG is superior to PCI for  
30  
31 subjects with or without diabetes and multivessel coronary disease.<sup>5 18 20</sup> As only CABG  
32  
33 is capable to reduce mortality and major cardiac events, a screening intervention aimed  
34  
35 to identify patients with multivessel coronary artery disease assumes that patients would  
36  
37 benefit from CABG. Therefore, a clear clinical benefit must be evident to justify the  
38  
39 risks and costs from screening and the potential procedures resulting from it.  
40  
41

42  
43 The analysis with a RRR of 20% showed that for cardiac events, myocardial infarction,  
44  
45 heart failure and revascularizations the results from TSA also showed that the number  
46  
47 of patients included was not enough. In addition, for all-cause mortality the RRR of  
48  
49 20% analysis also lacked power and it would be required an increase in the number of  
50  
51 patients by a factor of five, which is unlikely to happen.  
52  
53  
54  
55  
56  
57  
58  
59  
60

1  
2  
3 Another potential source for heterogeneity in our study is the inclusion of patients with  
4 type 1 diabetes in FACTOR – 64 study.<sup>6</sup> We believe this is not a major issue, as they  
5 represent only 10% of the sample in the original study, and 3% of the systematic review  
6 sample.  
7  
8

9  
10  
11 Some strengths of our study must be pointed out. We performed a comprehensive  
12 database search and identified all randomized trials evaluating the effects of a screening  
13 strategy for coronary artery disease in type 2 diabetic patients. Furthermore, the trials  
14 included are of high quality. As mentioned, there are some methodological differences  
15 between the studies, but the statistical heterogeneity was low or absent in the analyses.  
16  
17  
18

19  
20 We also performed detailed analyses of the data and through TSA we could discard a  
21 significant difference between treatment arms for all-cause mortality. Unfortunately, we  
22 cannot make the same firm conclusions for the cardiac events, myocardial infarction,  
23 heart failure, and revascularization outcomes.  
24  
25  
26  
27  
28  
29

30  
31 In conclusion, the present study supports the idea that type 2 diabetic patients without  
32 symptoms of coronary artery disease do not need to be screened for asymptomatic  
33 disease and that non-invasive coronary exams should be reserved for symptomatic  
34 patients. This would avoid unnecessary risks, patient distress and costs for  
35 asymptomatic patients.  
36  
37  
38  
39  
40  
41  
42  
43  
44  
45  
46  
47  
48  
49  
50  
51  
52  
53  
54  
55  
56  
57  
58  
59  
60



### **Acknowledgment**

We would like to thank Dr. Fabrizio Turrini for sharing additional data on his study (DADDY-D study).

Data sharing: no additional data available.

The criteria from the International Committee of Medical Journal Editors for authorship were followed and the final version of the manuscript has been approved for submission by all authors. This manuscript has not been published before, and is not being considered for publication in any other journal. DVR was responsible for study design, data acquisition, analysis, interpretation and drafting of the manuscript. LCP contributed to study design, reference selection and data acquisition and analysis. CBL contributed to study design, data analysis and interpretation and drafting of the manuscript. JLG contributed to study design, data analysis and interpretation and drafting of the manuscript. All authors have read and approved the final manuscript. Drs. Dimitris Varvaki Rados and Jorge Luiz Gross are the guarantors of this work and, as such, had full access to all the data in the study and take responsibility for the integrity of the data and the accuracy of the data analysis. Dr. Dimitris Varvaki Rados is the corresponding author.

### **Ethical Approval**

Not needed.

### **Role of the funding source**

1  
2  
3 This study was funded by the Conselho Nacional de Desenvolvimento Científico e  
4 Tecnológico (CNPq) and the Fundo de Incentivo à Pesquisa e Eventos from the  
5 Hospital de Clínicas de Porto Alegre. Support for the publication fee was provided.  
6  
7  
8  
9  
10 CNPq had no role in the design and conduct of the study; the extraction, management,  
11 analysis, or interpretation of the data; or the preparation, review, or approval of the  
12 manuscript.  
13  
14  
15

### 16 17 18 **Conflict of interests** 19

20 All authors have completed the ICMJE uniform disclosure form at  
21 [www.icmje.org/coi\\_disclosure.pdf](http://www.icmje.org/coi_disclosure.pdf) (available on request from the corresponding author)  
22 and declare that no support was received from any organization for the submitted work;  
23  
24  
25 JLG reports grants from Conselho Nacional de Desenvolvimento Científico e  
26 Tecnológico, during the conduct of the study; grants and other from Eli Lilly, grants  
27 from Bristol-Myers Squibb, grants and other from Boehringer Ingelheim, grants from  
28 GlaxoSmithKline, grants and other from Novo Nordisk, grants from Janssen, outside  
29 the submitted work; no other relationships or activities that could appear to have  
30 influenced the submitted work are reported.  
31  
32  
33  
34  
35  
36  
37  
38  
39  
40  
41  
42  
43  
44  
45  
46  
47  
48  
49  
50  
51  
52  
53  
54  
55  
56  
57  
58  
59  
60

**ABBREVIATION LIST**

CABG: Coronary artery bypass grafting

GRADE: Grading of Recommendations, Assessment, Development and Evaluations

PCI: Percutaneous coronary intervention

RR: Relative risk

RRR: Relative risk reduction

TSA: Trial sequential analysis

For peer review only

## References

1. Rajagopalan N, Miller TD, Hodge DO, et al. Identifying high-risk asymptomatic diabetic patients who are candidates for screening stress single-photon emission computed tomography imaging. *Journal of the American College of Cardiology* 2005;**45**(1):43-9.
2. Fihn SD, Gardin JM, Abrams J, et al. 2012 ACCF/AHA/ACP/AATS/PCNA/SCAI/STS guideline for the diagnosis and management of patients with stable ischemic heart disease: a report of the American College of Cardiology Foundation/American Heart Association task force on practice guidelines, and the American College of Physicians, American Association for Thoracic Surgery, Preventive Cardiovascular Nurses Association, Society for Cardiovascular Angiography and Interventions, and Society of Thoracic Surgeons. *Circulation* 2012;**126**(25):e354-471.
3. Yusuf S, Zucker D, Peduzzi P, et al. Effect of coronary artery bypass graft surgery on survival: overview of 10-year results from randomised trials by the Coronary Artery Bypass Graft Surgery Trialists Collaboration. *Lancet* 1994;**344**(8922):563-70.
4. Sedlis SP, Hartigan PM, Teo KK, et al. Effect of PCI on Long-Term Survival in Patients with Stable Ischemic Heart Disease. *New England Journal of Medicine* 2015;**373**(20):1937-46.
5. A Randomized Trial of Therapies for Type 2 Diabetes and Coronary Artery Disease. *New England Journal of Medicine* 2009;**360**(24):2503-15.
6. Muhlestein JB, Lappe DL, Lima JA, et al. Effect of screening for coronary artery disease using CT angiography on mortality and cardiac events in high-risk patients with diabetes: the FACTOR-64 randomized clinical trial. *JAMA : the journal of the American Medical Association* 2014;**312**(21):2234-43.
7. Young LH, Wackers FJ, Chyun DA, et al. Cardiac outcomes after screening for asymptomatic coronary artery disease in patients with type 2 diabetes: the DIAD study: a randomized controlled trial. *JAMA : the journal of the American Medical Association* 2009;**301**(15):1547-55.
8. Thorlund K, Engstrøm J, Wetterslev J, et al. User manual for Trial Sequential Analysis (TSA). Copenhagen Trial Unit, Centre for Clinical Intervention Research, Copenhagen, Denmark 2011:1-115.
9. Wetterslev J, Thorlund K, Brok J, et al. Trial sequential analysis may establish when firm evidence is reached in cumulative meta-analysis. *Journal of clinical epidemiology* 2008;**61**(1):64-75.
10. Moher D, Liberati A, Tetzlaff J, et al. Preferred reporting items for systematic reviews and meta-analyses: the PRISMA statement. *BMJ (Clinical research ed)* 2009;**339**:b2535.
11. Higgins JP, Altman DG, Gotzsche PC, et al. The Cochrane Collaboration's tool for assessing risk of bias in randomised trials. *BMJ (Clinical research ed)* 2011;**343**:d5928.
12. Schunemann HJ, Oxman AD, Brozek J, et al. Grading quality of evidence and strength of recommendations for diagnostic tests and strategies. *BMJ (Clinical research ed)* 2008;**336**(7653):1106-10.

13. Faglia E, Manuela M, Antonella Q, et al. Risk reduction of cardiac events by screening of unknown asymptomatic coronary artery disease in subjects with type 2 diabetes mellitus at high cardiovascular risk: an open-label randomized pilot study. *American heart journal* 2005;**149**(2):e1-6.
14. Lievre MM, Moulin P, Thivolet C, et al. Detection of silent myocardial ischemia in asymptomatic patients with diabetes: results of a randomized trial and meta-analysis assessing the effectiveness of systematic screening. *Trials* 2011;**12**:23.
15. Turrini F, Scarlini S, Mannucci C, et al. Does coronary Atherosclerosis Deserve to be Diagnosed early in Diabetic patients? The DADDY-D trial. Screening diabetic patients for unknown coronary disease. *European journal of internal medicine* 2015;**26**(6):407-13.
16. Guyatt GH, Oxman AD, Kunz R, et al. Incorporating considerations of resources use into grading recommendations. *BMJ (Clinical research ed)* 2008;**336**(7654):1170-3.
17. Douglas PS, Hoffmann U, Patel MR, et al. Outcomes of Anatomical versus Functional Testing for Coronary Artery Disease. *New England Journal of Medicine* 2015;**372**(14):1291-300.
18. Farkouh ME, Domanski M, Sleeper LA, et al. Strategies for Multivessel Revascularization in Patients with Diabetes. *New England Journal of Medicine* 2012;**367**(25):2375-84.
19. Celeng C, Maurovich-Horvat P, Ghoshhajra BB, et al. Prognostic Value of Coronary Computed Tomography Angiography in Patients With Diabetes: A Meta-analysis. *Diabetes care* 2016;**39**(7):1274-80.
20. Sipahi I, Akay MH, Dagdelen S, et al. Coronary artery bypass grafting vs percutaneous coronary intervention and long-term mortality and morbidity in multivessel disease: meta-analysis of randomized clinical trials of the arterial grafting and stenting era. *JAMA internal medicine* 2014;**174**(2):223-30.

1  
2  
3  
4 Figure 1. Forest plot and TSA of screening versus no screening for all-cause mortality  
5  
6 outcome

7  
8 A) Forest plot for all-cause mortality. B) TSA for a relative risk reduction of 40%. The  
9  
10 continuous blue line represents the Z line (cumulative effect size), red dashed lines  
11  
12 represent the harm, benefit and futility boundaries and the estimated optimal sample  
13  
14 size adjusted to sample size and repeated analysis. The continuous black lines represent  
15  
16 the conventional confidence intervals.  
17  
18  
19  
20  
21  
22  
23  
24  
25  
26  
27  
28  
29  
30  
31  
32  
33  
34  
35  
36  
37  
38  
39  
40  
41  
42  
43  
44  
45  
46  
47  
48  
49  
50  
51  
52  
53  
54  
55  
56  
57  
58  
59  
60

1  
2  
3 Figure 2. Forest plot and TSA of screening versus no screening for cardiac events  
4  
5 outcome

6  
7 A) Forest plot for all-cause mortality. B) TSA for a relative risk reduction of 40%. The  
8  
9 continuous blue line represents the Z line (cumulative effect size), red dashed lines  
10  
11 represent the harm, benefit and futility boundaries and the estimated optimal sample  
12  
13 size adjusted to sample size and repeated analysis. The continuous black lines represent  
14  
15 the conventional confidence intervals.  
16  
17  
18  
19  
20  
21  
22  
23  
24  
25  
26  
27  
28  
29  
30  
31  
32  
33  
34  
35  
36  
37  
38  
39  
40  
41  
42  
43  
44  
45  
46  
47  
48  
49  
50  
51  
52  
53  
54  
55  
56  
57  
58  
59  
60

# BMJ Open

**A**

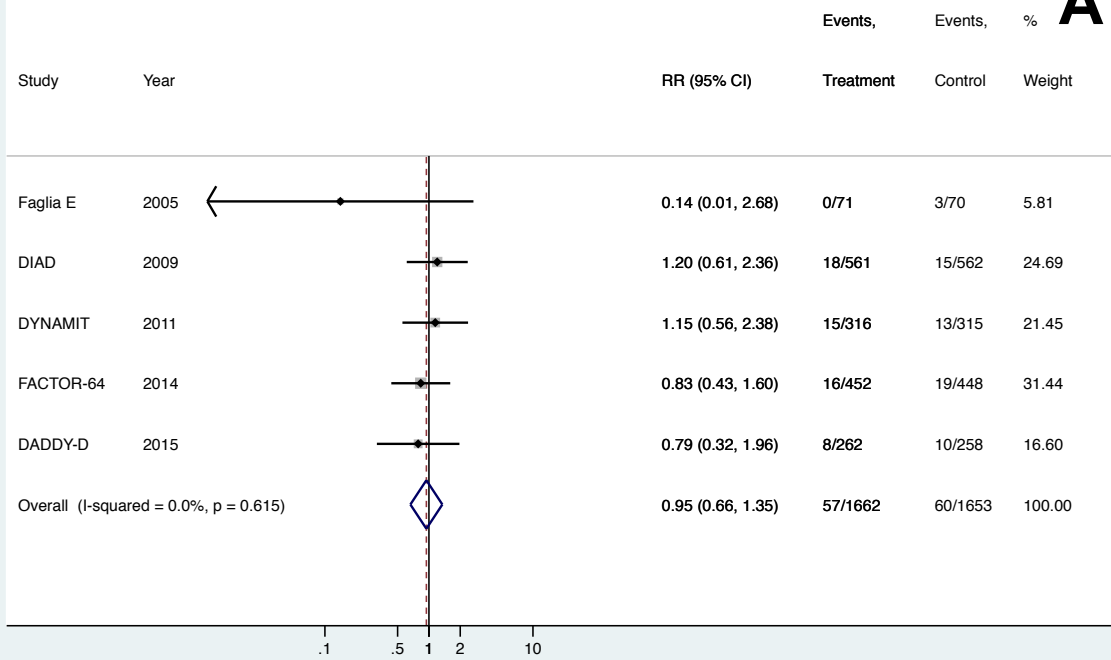

**B**

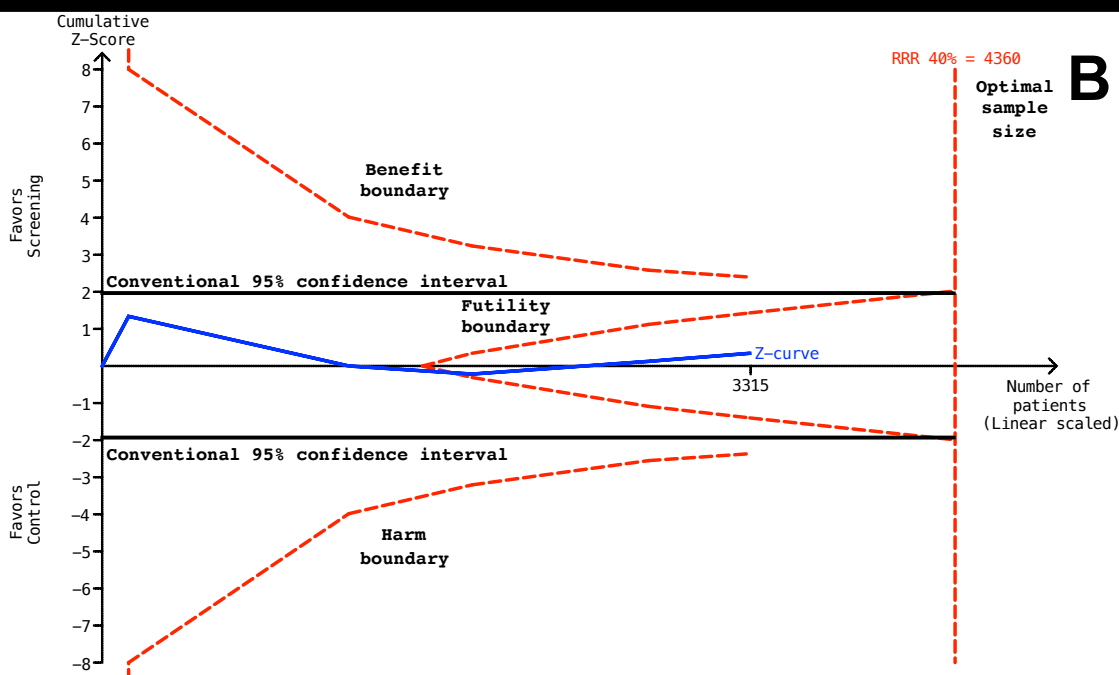



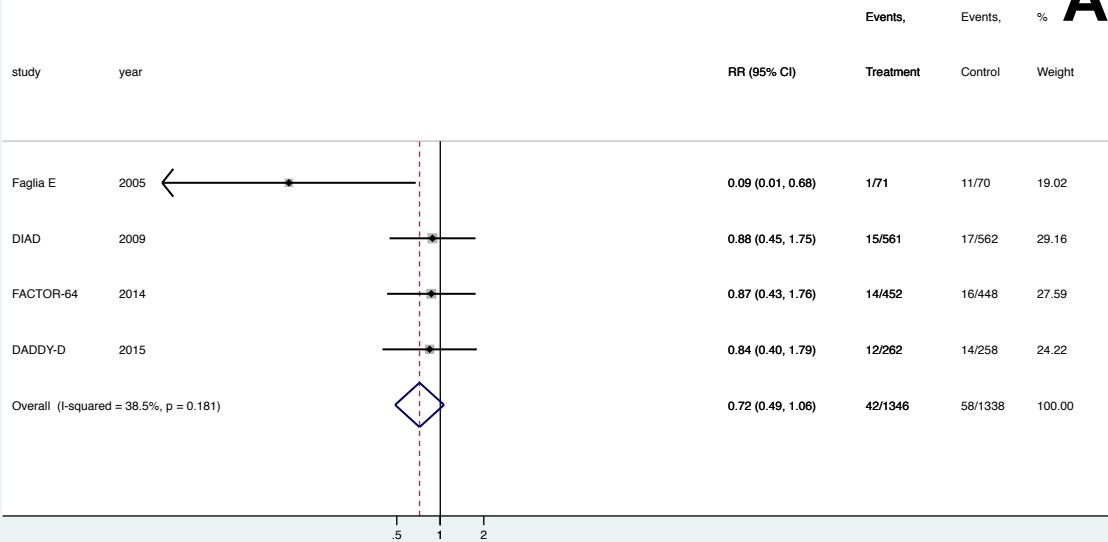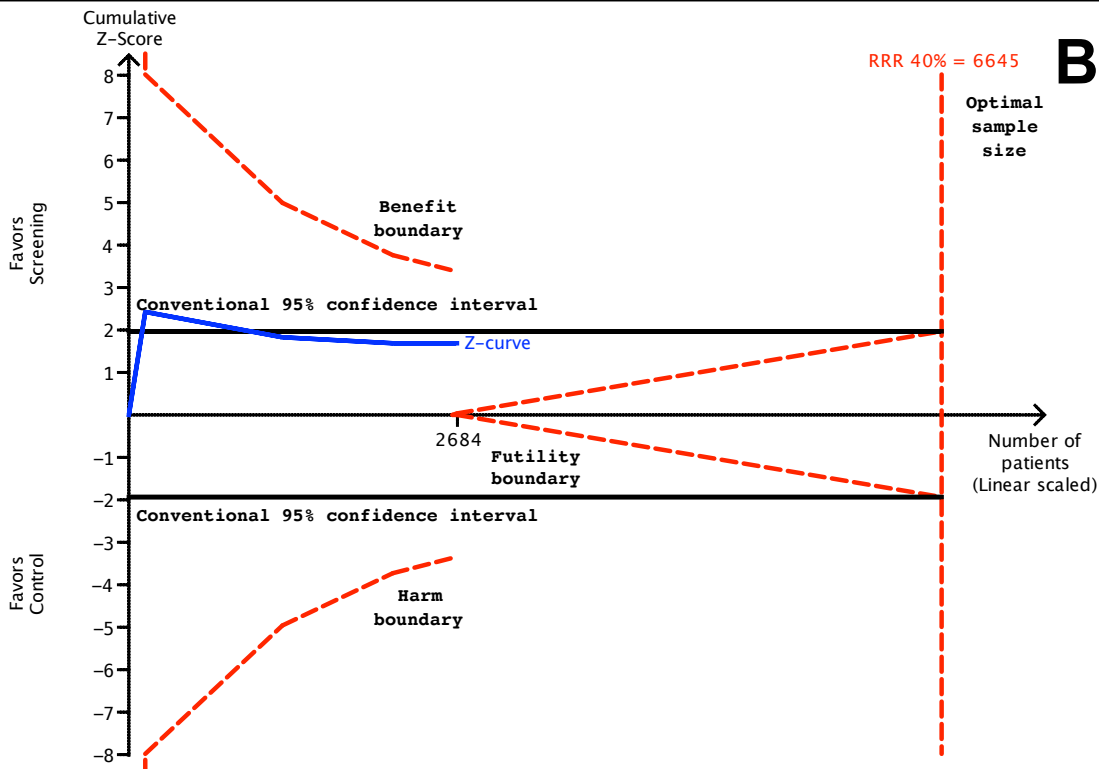

Figure 1. Study flowchart.

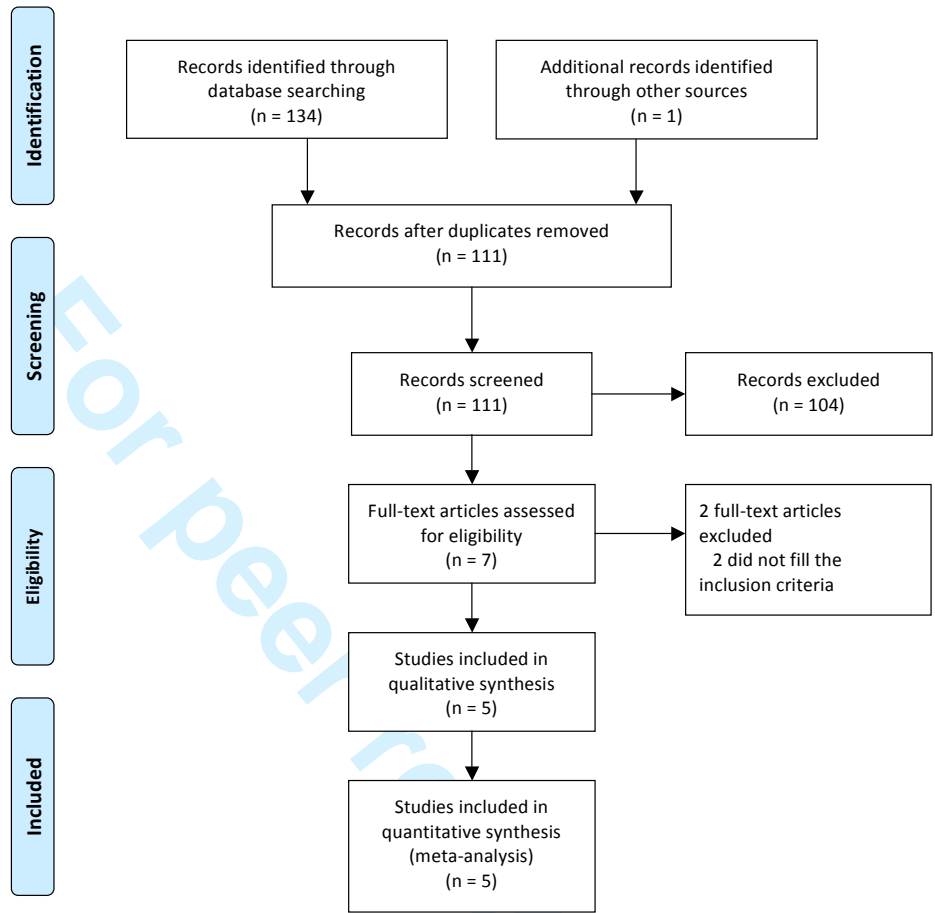

Figure 2. Risk of bias across studies.

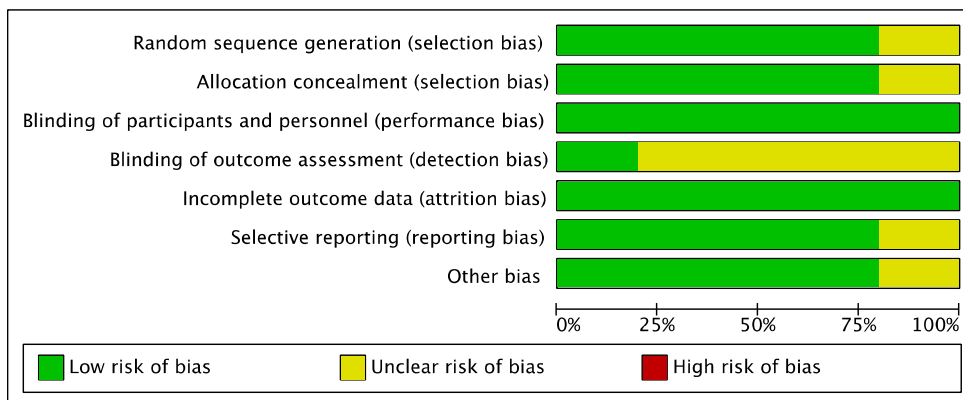

For peer review only

Figure 3. Risk of bias for individual studies.

|           | Random sequence generation (selection bias) | Allocation concealment (selection bias) | Blinding of participants and personnel (performance bias) | Blinding of outcome assessment (detection bias) | Incomplete outcome data (attrition bias) | Selective reporting (reporting bias) | Other bias |
|-----------|---------------------------------------------|-----------------------------------------|-----------------------------------------------------------|-------------------------------------------------|------------------------------------------|--------------------------------------|------------|
| DADDY-D   | +                                           | +                                       | +                                                         | ?                                               | +                                        | +                                    | +          |
| DIAD      | ?                                           | +                                       | +                                                         | ?                                               | +                                        | +                                    | +          |
| DYNAMIT   | +                                           | +                                       | +                                                         | +                                               | +                                        | ?                                    | +          |
| FACTOR-64 | +                                           | ?                                       | +                                                         | ?                                               | +                                        | +                                    | +          |
| Faglia    | +                                           | +                                       | +                                                         | ?                                               | +                                        | +                                    | ?          |

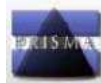

# PRISMA 2009 Checklist

1  
2  
3  
4  
5  
6  
7  
8  
9  
10  
11  
12  
13  
14  
15  
16  
17  
18  
19  
20  
21  
22  
23  
24  
25  
26  
27  
28  
29  
30  
31  
32  
33  
34  
35  
36  
37  
38  
39  
40  
41  
42  
43  
44  
45  
46  
47  
48  
49

| Section/topic                      | #  | Checklist item                                                                                                                                                                                                                                                                                              | Reported on page # |
|------------------------------------|----|-------------------------------------------------------------------------------------------------------------------------------------------------------------------------------------------------------------------------------------------------------------------------------------------------------------|--------------------|
| <b>TITLE</b>                       |    |                                                                                                                                                                                                                                                                                                             |                    |
| Title                              | 1  | Identify the report as a systematic review, meta-analysis, or both.                                                                                                                                                                                                                                         | 1                  |
| <b>ABSTRACT</b>                    |    |                                                                                                                                                                                                                                                                                                             |                    |
| Structured summary                 | 2  | Provide a structured summary including, as applicable: background; objectives; data sources; study eligibility criteria, participants, and interventions; study appraisal and synthesis methods; results; limitations; conclusions and implications of key findings; systematic review registration number. | 2                  |
| <b>INTRODUCTION</b>                |    |                                                                                                                                                                                                                                                                                                             |                    |
| Rationale                          | 3  | Describe the rationale for the review in the context of what is already known.                                                                                                                                                                                                                              | 4                  |
| Objectives                         | 4  | Provide an explicit statement of questions being addressed with reference to participants, interventions, comparisons, outcomes, and study design (PICOS).                                                                                                                                                  | 5                  |
| <b>METHODS</b>                     |    |                                                                                                                                                                                                                                                                                                             |                    |
| Protocol and registration          | 5  | Indicate if a review protocol exists, if and where it can be accessed (e.g., Web address), and, if available, provide registration information including registration number.                                                                                                                               | 5                  |
| Eligibility criteria               | 6  | Specify study characteristics (e.g., PICOS, length of follow-up) and report characteristics (e.g., years considered, language, publication status) used as criteria for eligibility, giving rationale.                                                                                                      | 6                  |
| Information sources                | 7  | Describe all information sources (e.g., databases with dates of coverage, contact with study authors to identify additional studies) in the search and date last searched.                                                                                                                                  | 5                  |
| Search                             | 8  | Present full electronic search strategy for at least one database, including any limits used, such that it could be repeated.                                                                                                                                                                               | 5                  |
| Study selection                    | 9  | State the process for selecting studies (i.e., screening, eligibility, included in systematic review, and, if applicable, included in the meta-analysis).                                                                                                                                                   | 6                  |
| Data collection process            | 10 | Describe method of data extraction from reports (e.g., piloted forms, independently, in duplicate) and any processes for obtaining and confirming data from investigators.                                                                                                                                  | 6                  |
| Data items                         | 11 | List and define all variables for which data were sought (e.g., PICOS, funding sources) and any assumptions and simplifications made.                                                                                                                                                                       | 6                  |
| Risk of bias in individual studies | 12 | Describe methods used for assessing risk of bias of individual studies (including specification of whether this was done at the study or outcome level), and how this information is to be used in any data synthesis.                                                                                      | 6                  |
| Summary measures                   | 13 | State the principal summary measures (e.g., risk ratio, difference in means).                                                                                                                                                                                                                               | 6-7                |
| Synthesis of results               | 14 | Describe the methods of handling data and combining results of studies, if done, including measures of consistency (e.g., $I^2$ for each meta-analysis).                                                                                                                                                    | 6-7                |

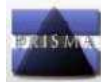

# PRISMA 2009 Checklist

Page 1 of 2

| Section/topic                 | #  | Checklist item                                                                                                                                                                                           | Reported on page #      |
|-------------------------------|----|----------------------------------------------------------------------------------------------------------------------------------------------------------------------------------------------------------|-------------------------|
| Risk of bias across studies   | 15 | Specify any assessment of risk of bias that may affect the cumulative evidence (e.g., publication bias, selective reporting within studies).                                                             | 6                       |
| Additional analyses           | 16 | Describe methods of additional analyses (e.g., sensitivity or subgroup analyses, meta-regression), if done, indicating which were pre-specified.                                                         | 7-8                     |
| <b>RESULTS</b>                |    |                                                                                                                                                                                                          |                         |
| Study selection               | 17 | Give numbers of studies screened, assessed for eligibility, and included in the review, with reasons for exclusions at each stage, ideally with a flow diagram.                                          | 8 and eFigure 1         |
| Study characteristics         | 18 | For each study, present characteristics for which data were extracted (e.g., study size, PICOS, follow-up period) and provide the citations.                                                             | Table 1                 |
| Risk of bias within studies   | 19 | Present data on risk of bias of each study and, if available, any outcome level assessment (see item 12).                                                                                                | eFigure 3               |
| Results of individual studies | 20 | For all outcomes considered (benefits or harms), present, for each study: (a) simple summary data for each intervention group (b) effect estimates and confidence intervals, ideally with a forest plot. | 8-9 and Figure 1 and 2  |
| Synthesis of results          | 21 | Present results of each meta-analysis done, including confidence intervals and measures of consistency.                                                                                                  | 8-9                     |
| Risk of bias across studies   | 22 | Present results of any assessment of risk of bias across studies (see Item 15).                                                                                                                          | eFigure 2               |
| Additional analysis           | 23 | Give results of additional analyses, if done (e.g., sensitivity or subgroup analyses, meta-regression [see Item 16]).                                                                                    | 8-9 and Figures 1 and 2 |
| <b>DISCUSSION</b>             |    |                                                                                                                                                                                                          |                         |
| Summary of evidence           | 24 | Summarize the main findings including the strength of evidence for each main outcome; consider their relevance to key groups (e.g., healthcare providers, users, and policy makers).                     | 9-10                    |
| Limitations                   | 25 | Discuss limitations at study and outcome level (e.g., risk of bias), and at review-level (e.g., incomplete retrieval of identified research, reporting bias).                                            | 11                      |
| Conclusions                   | 26 | Provide a general interpretation of the results in the context of other evidence, and implications for future research.                                                                                  | 10-11                   |
| <b>FUNDING</b>                |    |                                                                                                                                                                                                          |                         |
| Funding                       | 27 | Describe sources of funding for the systematic review and other support (e.g., supply of data); role of funders for the systematic review.                                                               | 12                      |

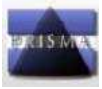

# PRISMA 2009 Checklist

1  
2  
3  
4  
5  
6  
7  
8  
9  
10  
11  
12  
13  
14  
15  
16  
17  
18  
19  
20  
21  
22  
23  
24  
25  
26  
27  
28  
29  
30  
31  
32  
33  
34  
35  
36  
37  
38  
39  
40  
41  
42  
43  
44  
45  
46  
47  
48  
49

doi:10.1371/journal.pmed1000097

For more information, visit: [www.prisma-statement.org](http://www.prisma-statement.org).

For peer review only

# BMJ Open

## Screening for Coronary Artery Disease in type 2 Diabetic Patients: A Meta-analysis and Trial Sequential Analysis

|                                 |                                                                                                                                                                                                                                                                                                                                                |
|---------------------------------|------------------------------------------------------------------------------------------------------------------------------------------------------------------------------------------------------------------------------------------------------------------------------------------------------------------------------------------------|
| Journal:                        | <i>BMJ Open</i>                                                                                                                                                                                                                                                                                                                                |
| Manuscript ID                   | bmjopen-2016-015089.R1                                                                                                                                                                                                                                                                                                                         |
| Article Type:                   | Research                                                                                                                                                                                                                                                                                                                                       |
| Date Submitted by the Author:   | 15-Dec-2016                                                                                                                                                                                                                                                                                                                                    |
| Complete List of Authors:       | Rados, Dimitris; Hospital de Clinicas de Porto Alegre, Division of Endocrinology<br>Catani Pinto, Lana; Hospital de Clinicas de Porto Alegre, Division of Endocrinology<br>Leitão, Cristiane; Hospital de Clinicas de Porto Alegre, Division of Endocrinology<br>Gross, Jorge; Hospital de Clinicas de Porto Alegre, Division of Endocrinology |
| <b>Primary Subject Heading</b>: | Diabetes and endocrinology                                                                                                                                                                                                                                                                                                                     |
| Secondary Subject Heading:      | Cardiovascular medicine, Epidemiology, Diagnostics, Evidence based practice                                                                                                                                                                                                                                                                    |
| Keywords:                       | meta-analysis, trial sequential analysis, Cardiovascular disease screening, type 2 diabetes, systematic review                                                                                                                                                                                                                                 |
|                                 |                                                                                                                                                                                                                                                                                                                                                |

SCHOLARONE™  
Manuscripts

Only



1  
2  
3 **Screening for Coronary Artery Disease in type 2 Diabetic Patients: A Meta-**  
4 **analysis and Trial Sequential Analysis**  
5  
6

7  
8  
9 Dimitris Varvaki Rados<sup>1</sup>, Lana Catani Pinto<sup>1</sup>, Cristiane Bauermann Leitão<sup>1</sup>, Jorge Luiz  
10 Gross<sup>1</sup>  
11  
12

13  
14  
15  
16 Division of Endocrinology, Hospital de Clínicas de Porto Alegre/Universidade Federal  
17 do Rio Grande do Sul, Ramiro Barcelos St, 2350, Prédio 12, 4<sup>o</sup> floor, ZIP 90035-903,  
18  
19 Porto Alegre, Brazil  
20  
21

22  
23 Correspondence to: Dimitris Varvaki Rados, [dvarvaki@gmail.com](mailto:dvarvaki@gmail.com)  
24  
25

26  
27 Dimitris Varvaki Rados, MD  
28

29 Lana Catani Pinto, MD  
30

31 Cristiane Bauermann Leitão, PhD  
32

33 Jorge Luiz Gross, PhD  
34  
35  
36  
37

38 **Word count:** 2794 words  
39  
40  
41  
42  
43  
44  
45  
46  
47  
48  
49  
50  
51  
52  
53  
54  
55  
56  
57  
58  
59  
60

**STRUCTURED ABSTRACT (252)**

**Objective:** To evaluate the efficacy of coronary artery disease screening in asymptomatic patients with type 2 diabetes and assess the statistical reliability of the findings.

**Methods:** Electronic databases (MEDLINE, EMBASE, Cochrane Library and clinicaltrials.org) were reviewed up to July 2016. Randomized controlled trials evaluating coronary artery disease screening in asymptomatic type 2 diabetic patients and reporting cardiovascular events and/or mortality were included. Data was summarized with Mantel-Haenszel relative risk. Trial sequential analysis (TSA) was used to evaluate the optimal sample size to detect a 40% reduction in outcomes. Main outcomes were all-cause mortality and cardiac events (non-fatal myocardial infarction and cardiovascular death); secondary outcomes were non-fatal myocardial infarction, myocardial revascularizations and heart failure.

**Results:** One hundred thirty five references were identified and 5 studies fulfilled the inclusion criteria and totalized 3315 patients, 117 all-cause deaths and 100 cardiac events. Screening for coronary artery disease was not associated with decrease in risk for all-cause deaths (RR 0.95 [95% CI 0.66 to 1.35]) or cardiac events (RR 0.72 [95% CI 0.49 to 1.06]). TSA shows that futility boundaries were reached for all-cause mortality and a relative risk reduction of 40% between treatments could be discarded. However, there is not enough information for firm conclusions for cardiac events. For secondary outcomes no benefit or harm was identified; optimal sample sizes were not reached.

1  
2  
3 **Conclusion:** Current available data do not support screening type 2 diabetic patients for  
4  
5 coronary artery for preventing fatal events. Further studies are needed to assess the  
6  
7 effects on cardiac events.  
8

9  
10 **PROSPERO:** CRD42015026627.  
11

12  
13  
14  
15  
16 **KEYWORDS:** Cardiovascular disease screening; type 2 diabetes; systematic review;  
17  
18 meta-analysis; trial sequential analysis.  
19  
20  
21  
22  
23  
24  
25  
26  
27  
28  
29  
30  
31  
32  
33  
34  
35  
36  
37  
38  
39  
40  
41  
42  
43  
44  
45  
46  
47  
48  
49  
50  
51  
52  
53  
54  
55  
56  
57  
58  
59  
60

## ARTICLE SUMMARY

### Strengths and limitations of this study

- Electronic databases were reviewed to identify randomized controlled trials evaluating screening for coronary artery disease in type 2 diabetes.
- Results from individual studies were combined and summarized with Mantel-Haenszel relative risk.
- Trial sequential analysis was used to assess the optimal sample size for the outcomes.
- The results should be interpreted with caution as different screening methods were combined.

## INTRODUCTION

Diabetes mellitus is a well-known risk factor for atherosclerosis and asymptomatic coronary disease is frequent and associated with increased mortality.<sup>1</sup> Intensive medical treatment with antiplatelet agents, statins, as well as blood pressure and glycaemic control decrease the number of cardiovascular events in patients with established coronary artery disease.<sup>2</sup> It is expected that early detection and treatment of myocardial ischemia would lead to similar benefits.

Coronary artery bypass grafting reduces mortality by 40% in patients with diabetes and established multivessel coronary disease.<sup>3</sup> However, percutaneous coronary intervention (PCI) does not appear to influence mortality in patients with asymptomatic and stable coronary artery disease (with or without diabetes) when compared to intensive medical therapy alone.<sup>4</sup> BARI 2D study results showed no benefit of early revascularization in patients with type 2 diabetes. On the other hand, it suggested that coronary artery bypass grafting (CABG) might be better than medical therapy alone, but this finding must be interpreted with caution, as the allocation to PCI or CABG was not randomized.<sup>5</sup> Moreover, patients with diabetes and high-risk coronary lesions do benefit from CABG.<sup>3</sup> In summary, the goal of a screening strategy for coronary artery disease in type 2 diabetic patients would be the identification of subjects with high-risk coronary lesions (multivessel), who would be eligible for CABG and might benefit from this intervention by reducing coronary events and mortality.

Some trials directly evaluated the effects of screening for coronary artery disease vs. usual care and found no benefit for mortality or coronary events.<sup>6,7</sup> These trials were performed with adequate designs but in most cases have limited conclusions due to lack of power.<sup>6,7</sup> Meta-analysis is a valuable tool in this situation, as it combines studies in a

1  
2  
3 single analysis, which increases the sample size. Furthermore, trial sequential analysis  
4  
5 (TSA) enables the assessment of sample size power and the need for further studies.<sup>8 9</sup>  
6  
7 Therefore, our objective was to assess the efficacy of screening for asymptomatic  
8  
9 coronary artery disease in type 2 diabetic patients compared to no screening in reducing  
10  
11 cardiac events (non-fatal myocardial infarction and cardiovascular mortality) and all-  
12  
13 cause mortality. Furthermore, we aimed to evaluate the statistical reliability (sample  
14  
15 size power) of the results.  
16  
17  
18  
19

## 20 21 **RESEARCH DESIGN AND METHODS**

22  
23 This study follows the PRISMA statement for reporting systematic reviews and meta-  
24  
25 analysis.<sup>10</sup> The present review was registered in the PROSPERO registry under number  
26  
27 CRD42015026627.  
28  
29

### 30 31 **Search strategy**

32  
33 To perform the present study, we searched for randomized controlled trials evaluating  
34  
35 the effects of screening for coronary artery disease in type 2 diabetic patients reporting  
36  
37 any of the outcomes of interest, which were non-fatal myocardial infarction,  
38  
39 cardiovascular and all-cause mortality, myocardial revascularizations and heart failure  
40  
41 events. Pubmed, EMBASE, Cochrane library and clinicaltrials.org databases were  
42  
43 searched from inception through July 2016 using the following terms: type 2 diabetes,  
44  
45 screening of coronary heart disease and randomized clinical trial. No restrictions were  
46  
47 made regarding study length, publication year or language. The full search terms for  
48  
49 Pubmed were: *(screening AND coronary artery disease) AND (randomized controlled*  
50  
51 *trial[Publication Type] OR randomized[Title/Abstract] OR placebo[Title/Abstract])*  
52  
53  
54  
55  
56  
57  
58  
59  
60

1  
2  
3 AND "Diabetes Mellitus, Type 2"[Mesh]. We also searched the references lists of main  
4  
5 publications on the topic manually.  
6  
7

### 8 9 10 **Study selection**

11 Two authors (DVR and LCP) performed the study selection independently. We  
12  
13 included any randomized controlled trial which included type 2 diabetic patients and  
14  
15 that evaluated the effects of any coronary artery disease screening method on the  
16  
17 incidence of non-fatal myocardial infarction, cardiovascular or all-cause mortality. We  
18  
19 excluded studies that were not randomized and that compared two different screening  
20  
21 methods. Initially, titles and abstracts were reviewed for potentially eligible studies.  
22  
23 These studies were then evaluated in full-text and those reporting any of the selected  
24  
25 outcomes were considered for the final review and meta-analysis.  
26  
27  
28  
29  
30  
31

### 32 **Data extraction**

33 The following information was extracted with a standardized form: first author's name;  
34  
35 study name and year of publication; screening method; study registry; baseline HbA<sub>1c</sub>  
36  
37 and age; number of men; number of patients in each group; follow-up time; number of  
38  
39 events: non-fatal myocardial infarction, cardiovascular and all-cause deaths,  
40  
41 revascularizations and heart failure events. We defined cardiac events as a composite of  
42  
43 non-fatal myocardial infarctions and cardiovascular deaths.  
44  
45  
46  
47  
48  
49

### 50 **Appraisal of study quality**

51 We evaluated the risk of bias at the study level with the Cochrane Collaboration tool;<sup>11</sup>  
52  
53 for the "other bias" item we evaluated the presence of a trial registry as low risk of bias  
54  
55  
56  
57  
58  
59  
60

1  
2  
3 and lack of registry as high-risk. We defined no pre-specified analysis based on the risk  
4  
5 of bias of the individual studies. The overall quality of the evidence of each meta-  
6  
7 analysis was classified as 'high', 'moderate', 'low' or 'very low' based on the Grading  
8  
9 of Recommendations, Assessment, Development and Evaluations (GRADE).<sup>12</sup>  
10

### 11 12 13 **Data analysis**

14  
15 The outcomes of interest were summarized as relative risk (RR) of screening vs. no  
16  
17 screening and they were combined using the Mantel-Haenszel RR. The heterogeneity  
18  
19 was assessed using the  $I^2$  tests ( $I^2 > 50\%$  indicating high heterogeneity).  
20  
21

22  
23 One of the aims of our study was to assess the reliability of the results – that is, to  
24  
25 evaluate the ideal sample size to establish firm conclusions about the findings.<sup>9</sup> To  
26  
27 accomplish this we performed TSA of the data. Interim analysis of a single randomized  
28  
29 trial avoids type I error by creating monitoring boundaries for an estimated difference  
30  
31 between groups, so if the estimated difference is reached the trial could be terminated.  
32  
33 TSA uses a similar accurate method to create monitoring boundaries and estimate the  
34  
35 optimal sample size in meta-analyses.<sup>8,9</sup> TSA performs a cumulative meta-analysis with  
36  
37 the results of the available studies (represented by the Z-curve): as each new study is  
38  
39 included, significance is tested and confidence intervals are estimated. It also creates  
40  
41 adjusted boundaries for benefit, harm and futility and estimates the optimal sample size  
42  
43 for a given difference between treatment arms, so that a smaller estimated difference  
44  
45 would result in wider boundaries and a greater optimal sample size.<sup>8</sup> Because  
46  
47 cumulative meta-analyses may lead to false positive results due to repetitive testing, this  
48  
49 evaluation is adjusted to control for repeated analyses, while maintaining type I error at  
50  
51 5% and the power at 80%.<sup>8</sup> It is also adjusted for the variability between trials and for  
52  
53  
54  
55  
56  
57  
58  
59  
60



1  
2  
3 the amount of available evidence. If one of the boundaries (benefit, risk or futility) or if  
4  
5 the optimal sample size is reached, firm conclusions might be made (for that predefined  
6  
7 difference) and further studies are deemed unnecessary; instead, if no boundaries are  
8  
9 reached, further studies are needed to settle the question.<sup>8</sup> For the present analysis, we  
10  
11 performed a TSA for a relative difference (relative risk reduction – RRR) between  
12  
13 groups of 40% and considered as control group event rate the incidence observed in the  
14  
15 control group for each outcome. The RRR value was chosen based on the expected  
16  
17 benefit of revascularization in the mortality rate demonstrated by previous studies.<sup>3</sup> An  
18  
19 additional TSA analysis was also performed using a RRR of 20%.

20  
21  
22 The risk of bias graph was generated with RevMan software version 5.3 (Cochrane  
23  
24 Collaboration, Copenhagen, Denmark). The meta-analyses were performed with Stata  
25  
26 version 12.0 (Stata Inc., College Station, Texas, USA) and the TSA and graphics were  
27  
28 generated using TSA software version 0.9 [beta] (Copenhagen Trial Unit, Copenhagen,  
29  
30 Denmark).

## 31 32 33 34 35 **RESULTS**

36  
37 The search in electronic databases and the manual review retrieved 135 studies for the  
38  
39 evaluation of titles and abstracts. After screening, 7 studies were evaluated in full-text  
40  
41 and 5 fulfilled the inclusion and exclusion criteria.<sup>6 7 13-15</sup> The study flowchart is  
42  
43 depicted in supplementary material (Supplemental Material, Figure 1).

44  
45 The included studies comprised patients with a mean age of 61 years, with a mean  
46  
47 HbA<sub>1c</sub> of 7.6 % and the mean follow-up was 4.1 years. Additional characteristics are  
48  
49 presented in Table 1. Most studies performed screening with stress testing along with  
50  
51 electrocardiography, echocardiography or scintigraphy monitoring; one study  
52  
53 performed coronary computed tomography angiography with measurement of coronary  
54  
55

1  
2  
3 calcium. The studies totalized 3315 patients with 117 all-cause deaths and 100 cardiac  
4  
5 events.  
6  
7  
8  
9  
10  
11  
12  
13  
14  
15  
16  
17  
18  
19  
20  
21  
22  
23  
24  
25  
26  
27  
28  
29  
30  
31  
32  
33  
34  
35  
36  
37  
38  
39  
40  
41  
42  
43  
44  
45  
46  
47  
48  
49  
50  
51  
52  
53  
54  
55  
56  
57  
58  
59  
60

For peer review only

Table 1. Included study characteristics

| Study Name | First author                  | Publication year | Screening method                                             | Management recommendation |
|------------|-------------------------------|------------------|--------------------------------------------------------------|---------------------------|
| --         | Faglia E <sup>13</sup>        | 2005             | Exercise<br>electrocardiogram and<br>stress echocardiography | Yes                       |
|            |                               |                  | No screening                                                 | No                        |
| DIAD       | Young LH <sup>7</sup>         | 2009             | Stress scintigraphy                                          | No                        |
|            |                               |                  | No screening                                                 | No                        |
| DYNAMIT    | Lièvre MM <sup>14</sup>       | 2011             | Bicycle exercise test or<br>stress scintigraphy              | No                        |
|            |                               |                  | No screening                                                 | No                        |
| FACTOR-64  | Muhlestein<br>JB <sup>6</sup> | 2014             | Coronary computed<br>tomography<br>angiography               | Yes                       |
|            |                               |                  | No screening                                                 | No                        |
| DADDY-D    | Turrini F <sup>15</sup>       | 2015             | Exercise<br>electrocardiogram                                | Yes                       |
|            |                               |                  | No screening                                                 | No                        |

Table 1. Included study characteristics (continued)

| Patients (n) | Age (years) | HbA1c (%) | Blood pressure (mmHg) | Smoking (%) | Statin use (%) | Aspirin use (%) | Mean Follow-up (years) | Registry |
|--------------|-------------|-----------|-----------------------|-------------|----------------|-----------------|------------------------|----------|
| 71           | 58.7 ± 8.3  | 8.6 ± 2.3 | 143/85                | 46          | 28             | 9               | 4.4                    | No       |
| 70           | 61.5 ± 8.1  | 8.4 ± 1.9 | 141/84                | 55          | 21             | 12              |                        |          |
| 561          | 60.7 ± 6.7  | 7.2 ± 1.6 | 133/80                | 10          | 37             | 43              | 4.8                    | Yes      |
| 562          | 60.8 ± 6.4  | 7 ± 1.5   | 132/79                | 9           | 41             | 46              |                        |          |
| 316          | 64.1 ± 6.4  | 8.6 ± 2.2 | N.R.                  | 17          | 33             | 39              | 3.5                    | Yes      |
| 315          | 63.7 ± 6.4  | 8.7 ± 2   | N.R.                  | 14          | 36             | 24              |                        |          |
| 452          | 61.5 ± 7.9  | 7.4 ± 1.4 | 129/74                | 16          | 76             | 43              | 4.0                    | Yes      |
| 448          | 61.6 ± 8.3  | 7.5 ± 1.4 | 130/74                | 15          | 72             | 40              |                        |          |
| 262          | 61.9 ± 4.8  | 7.7 ± 1.4 | 140/81                | 40          | 39             | 29              | 3.6                    | Yes      |
| 258          | 62 ± 5.1    | 7.8 ± 1.3 | 141/81                | 37          | 44             | 25              |                        |          |

Data showed no difference between patients in coronary artery disease screening and control groups for all-cause death incidence (Figure 1a): RR 0.95 (95% CI 0.66 to 1.35). There was low heterogeneity ( $I^2 = 0\%$  and  $p = 0.615$ ). TSA for all-cause mortality events indicates that the futility boundary was reached, so a difference of 40% between groups is firmly discarded and no further studies are required (Figure 1b). For the RRR of 20% neither the optimal sample size (19548 patients) nor the futility boundary were reached.

There was also no difference in cardiac events (Figure 2a): RR 0.72 (95% CI 0.49 to 1.06;  $I^2 = 38.5\%$  and  $p = 0.181$ ). For this outcome, TSA shows that the optimal sample size is 6645 patients, which is larger than the current sample. Furthermore, neither the

benefit nor the futility boundaries were reached (Figure 2b). The analysis with the (RRR of 20% showed similar results, but with a much larger optimal sample size (29763 patients).

Additional outcome analyses are presented in Table 2: the coronary artery disease screening group was similar to the control group for non-fatal myocardial infarction (RR 0.65 [95% CI 0.41 to 1.02]), heart failure (RR 0.60 [95% CI 0.33 to 1.10]) and myocardial revascularizations (PCI and CABG) (RR 1.08 [95% CI 0.83 to 1.41]). None of these outcomes reached the optimal sample size or the boundaries for futility.

Table 2. Results for myocardial infarction, revascularization and heart failure of screening versus no screening

| Outcome                         | RR (95% CI)        | Accrued Population | Optimal Sample Size (RRR = 40 %) | Optimal Sample Size (RRR = 20 %) |
|---------------------------------|--------------------|--------------------|----------------------------------|----------------------------------|
| Non-fatal Myocardial Infarction | 0.65 (0.41 - 1.02) | 3315               | 6154                             | 17495                            |
| Heart Failure                   | 0.60 (0.33 - 1.10) | 3174               | 10990                            | 49352                            |
| Revascularizations              | 1.08 (0.83 - 1.41) | 3174               | 10598                            | 47339                            |

Overall, the study quality was high according to the Cochrane Collaboration tool (Supplemental Material, Figures 2 and 3).<sup>11</sup> It must be stressed that none of the studies was blinded, but this was not considered a limitation because blinding of participants (patients and clinicians) was not feasible due to the type of intervention (screening). On the other hand, blinding of outcome assessment was reported in only one study.

1  
2  
3 According to GRADE,<sup>16</sup> quality of evidence was judged as high quality for both main  
4  
5 outcomes (all-cause mortality and cardiac events).  
6

## 7 8 **DISCUSSION**

9  
10 In the present study we identified no benefit of screening for asymptomatic coronary  
11  
12 artery disease for all-cause mortality in patients with type 2 diabetes. This conclusion is  
13  
14 supported by a sufficient number of patients, as shown by TSA. Although we found no  
15  
16 benefit for the other outcomes evaluated, such as cardiovascular events, these results are  
17  
18 not definitive, as they are not supported by an adequate number of patients. This review  
19  
20 shows that further studies evaluating coronary artery disease screening in type 2  
21  
22 diabetes are required before definitive recommendations on this topic can be made.

23  
24 A relevant point of our analysis is the trend for statistically significant difference found  
25  
26 in cardiac events and non-fatal myocardial infarction favouring the screening group.

27  
28 This finding seems to be driven by the study of Faglia et al.,<sup>13</sup> which was the smallest  
29  
30 and oldest study included in our analysis. Moreover, patients in this study had an  
31  
32 unfavourable clinical profile, represented by the worst glycemic control, the highest  
33  
34 blood pressure, the greatest prevalence of smoking and the lowest use of statins and  
35  
36 aspirin in comparison with the others studies. Despite this trend, TSA shows that there  
37  
38 is insufficient data to perform firm conclusion about cardiac events and myocardial  
39  
40 infarction. Therefore, further studies are needed to investigate the effects of screening  
41  
42 for coronary artery disease in these outcomes.  
43  
44  
45

46  
47 Some limitations of this review must be acknowledged. First, the trials performed  
48  
49 different screening tests with different specificity and sensitivity.<sup>2</sup> This generate two  
50  
51 potential problems: studies using technics with lower accuracy might compromise the  
52  
53 benefit of other technics, and combining these different tests may be questionable.  
54  
55  
56

1  
2  
3 Despite this, current guidelines do not define a preferable strategy for the diagnosis of  
4 coronary artery disease,<sup>2</sup> and a clinical trial support this position.<sup>17</sup> Therefore, we  
5 believe these tests may be aggregated in a meta-analysis, as they all aim to identify  
6 high-risk patients with greater chance to benefit from CABG.<sup>3 5 18</sup> We cannot rule out  
7 the possibility that a test with higher sensitivity (coronary computed tomography  
8 angiography)<sup>19</sup> would be beneficial.<sup>2</sup> However the individual results of the FACTOR-64  
9 which used a highly accurate method do not support this conclusion,<sup>6</sup> and, as discussed  
10 above, the potential benefit we identified in this review seems to be derived from only  
11 one study<sup>13</sup> that used tests with low to moderate sensitivity.

12  
13 The second limitation was the somewhat choice of a relative difference of 40% between  
14 treatment arms. It was based on the benefits of CABG for patients with severe coronary  
15 artery disease.<sup>3</sup> Even though this evidence was published in the 90s, it is still largely  
16 used by guidelines to recommend revascularization for stable coronary artery disease. In  
17 addition, recent studies and meta-analysis have shown that CABG is superior to PCI for  
18 subjects with or without diabetes and multivessel coronary disease.<sup>5 18 20</sup> As only CABG  
19 is capable to reduce mortality and major cardiac events, a screening intervention aimed  
20 to identify patients with multivessel coronary artery disease assumes that patients would  
21 benefit from CABG. Therefore, a clear clinical benefit must be evident to justify the  
22 risks and costs from screening and the potential procedures resulting from it.

23  
24 The analysis with a RRR of 20% showed that for cardiac events, myocardial infarction,  
25 heart failure and revascularizations the results from TSA also showed that the number  
26 of patients included was not enough. In addition, for all-cause mortality the RRR of  
27 20% analysis also lacked power and it would be required an increase in the number of  
28 patients by a factor of five, which is unlikely to happen.

1  
2  
3 Another potential source for heterogeneity in our study is the inclusion of patients with  
4 different basal cardiovascular risk due to comorbidities and risk factors. As discussed  
5 above, this might be the case of Faglia et al. study,<sup>13</sup> which had older patients with an  
6 unfavorable clinical profile and found reduced risk of myocardial screening with the  
7 screening. Due to the limited number of studies, subgroup analyses could not be  
8 performed. FACTOR – 64 study included some patients with type 1 diabetes,<sup>6</sup> but this  
9 seems minor issue, as they represent only 10% of the sample in the original study, and  
10 3% of the systematic review sample. Finally, the results of this systematic review are  
11 restricted to patients with characteristics comparable to the included patients in the  
12 individual studies. So these conclusions are not applicable to some higher risk  
13 populations, such as chronic kidney injury patients.

14  
15  
16  
17  
18  
19  
20  
21  
22  
23  
24  
25  
26  
27 Some strengths of our study must be pointed out. We performed a comprehensive  
28 database search and identified all randomized trials evaluating the effects of a screening  
29 strategy for coronary artery disease in type 2 diabetic patients. Furthermore, the trials  
30 included are of high quality. As mentioned, there are some methodological differences  
31 between the studies, but the statistical heterogeneity was low or absent in the analyses.  
32 We also performed detailed analyses of the data and through TSA we could discard a  
33 significant difference between treatment arms for all-cause mortality. Unfortunately, we  
34 cannot make the same firm conclusions for the cardiac events, myocardial infarction,  
35 heart failure, and revascularization outcomes.

36  
37  
38  
39  
40  
41  
42  
43  
44  
45  
46  
47 In conclusion, the present study supports the idea that type 2 diabetic patients without  
48 symptoms of coronary artery disease do not need to be screened for asymptomatic  
49 disease and that non-invasive coronary exams should be reserved for symptomatic  
50 patients. This would avoid unnecessary risks, patient distress and costs for  
51  
52  
53  
54  
55  
56



1  
2  
3  
4  
5  
6  
7  
8  
9  
10  
11  
12  
13  
14  
15  
16  
17  
18  
19  
20  
21  
22  
23  
24  
25  
26  
27  
28  
29  
30  
31  
32  
33  
34  
35  
36  
37  
38  
39  
40  
41  
42  
43  
44  
45  
46  
47  
48  
49  
50  
51  
52  
53  
54  
55  
56  
57  
58  
59  
60

asymptomatic patients. For other events new studies are still needed before definitive recommendations can be made.

For peer review only

### **Acknowledgment**

We would like to thank Dr. Fabrizio Turrini for sharing additional data on his study (DADDY-D study).

Data sharing: no additional data available.

The criteria from the International Committee of Medical Journal Editors for authorship were followed and the final version of the manuscript has been approved for submission by all authors. This manuscript has not been published before, and is not being considered for publication in any other journal. DVR was responsible for study design, data acquisition, analysis, interpretation and drafting of the manuscript. LCP contributed to study design, reference selection and data acquisition and analysis. CBL contributed to study design, data analysis and interpretation and drafting of the manuscript. JLG contributed to study design, data analysis and interpretation and drafting of the manuscript. All authors have read and approved the final manuscript. Drs. Dimitris Varvaki Rados and Jorge Luiz Gross are the guarantors of this work and, as such, had full access to all the data in the study and take responsibility for the integrity of the data and the accuracy of the data analysis. Dr. Dimitris Varvaki Rados is the corresponding author.

### **Ethical Approval**

Not needed.

### **Role of the funding source**

1  
2  
3 This study was funded by the Conselho Nacional de Desenvolvimento Científico e  
4 Tecnológico (CNPq) and the Fundo de Incentivo à Pesquisa e Eventos from Hospital de  
5 Clínicas de Porto Alegre. Support for the publication fee was provided. CNPq had no  
6 role in the design and conduct of the study; the extraction, management, analysis, or  
7 interpretation of the data; or the preparation, review, or approval of the manuscript.  
8  
9  
10  
11  
12

### 13 14 15 16 **Conflict of interests**

17 All authors have completed the ICMJE uniform disclosure form at  
18 [www.icmje.org/coi\\_disclosure.pdf](http://www.icmje.org/coi_disclosure.pdf) (available on request from the corresponding author)  
19 and declare that no support was received from any organization for the submitted work;  
20 JLG reports grants from Conselho Nacional de Desenvolvimento Científico e  
21 Tecnológico, during the conduct of the study; grants and other from Eli Lilly, grants  
22 from Bristol-Myers Squibb, grants and other from Boehringer Ingelheim, grants from  
23 GlaxoSmithKline, grants and other from Novo Nordisk, grants from Janssen, outside  
24 the submitted work; no other relationships or activities that could appear to have  
25 influenced the submitted work are reported.  
26  
27  
28  
29  
30  
31  
32  
33  
34  
35  
36  
37  
38  
39  
40  
41  
42  
43  
44  
45  
46  
47  
48  
49  
50  
51  
52  
53  
54  
55  
56  
57  
58  
59  
60

**ABBREVIATION LIST**

CABG: Coronary artery bypass grafting

GRADE: Grading of Recommendations, Assessment, Development and Evaluations

PCI: Percutaneous coronary intervention

RR: Relative risk

RRR: Relative risk reduction

TSA: Trial sequential analysis

## References

1. Rajagopalan N, Miller TD, Hodge DO, et al. Identifying high-risk asymptomatic diabetic patients who are candidates for screening stress single-photon emission computed tomography imaging. *Journal of the American College of Cardiology* 2005;45(1):43-9. doi: 10.1016/j.jacc.2004.06.078 [published Online First: 2005/01/05]
2. Fihn SD, Gardin JM, Abrams J, et al. 2012 ACCF/AHA/ACP/AATS/PCNA/SCAI/STS guideline for the diagnosis and management of patients with stable ischemic heart disease: a report of the American College of Cardiology Foundation/American Heart Association task force on practice guidelines, and the American College of Physicians, American Association for Thoracic Surgery, Preventive Cardiovascular Nurses Association, Society for Cardiovascular Angiography and Interventions, and Society of Thoracic Surgeons. *Circulation* 2012;126(25):e354-471. doi: 10.1161/CIR.0b013e318277d6a0 [published Online First: 2012/11/21]
3. Yusuf S, Zucker D, Peduzzi P, et al. Effect of coronary artery bypass graft surgery on survival: overview of 10-year results from randomised trials by the Coronary Artery Bypass Graft Surgery Trialists Collaboration. *Lancet* 1994;344(8922):563-70. [published Online First: 1994/08/27]
4. Sedlis SP, Hartigan PM, Teo KK, et al. Effect of PCI on Long-Term Survival in Patients with Stable Ischemic Heart Disease. *New England Journal of Medicine* 2015;373(20):1937-46. doi: doi:10.1056/NEJMoa1505532
5. A Randomized Trial of Therapies for Type 2 Diabetes and Coronary Artery Disease. *New England Journal of Medicine* 2009;360(24):2503-15. doi: doi:10.1056/NEJMoa0805796
6. Muhlestein JB, Lappe DL, Lima JA, et al. Effect of screening for coronary artery disease using CT angiography on mortality and cardiac events in high-risk patients with diabetes: the FACTOR-64 randomized clinical trial. *JAMA : the journal of the American Medical Association* 2014;312(21):2234-43. doi: 10.1001/jama.2014.15825 [published Online First: 2014/11/18]
7. Young LH, Wackers FJ, Chyun DA, et al. Cardiac outcomes after screening for asymptomatic coronary artery disease in patients with type 2 diabetes: the DIAD study: a randomized controlled trial. *JAMA : the journal of the American Medical Association* 2009;301(15):1547-55. doi: 10.1001/jama.2009.476 [published Online First: 2009/04/16]
8. Thorlund K, Engstrøm J, Wetterslev J, et al. User manual for Trial Sequential Analysis (TSA). *Copenhagen Trial Unit, Centre for Clinical Intervention Research, Copenhagen, Denmark* 2011:1-115.
9. Wetterslev J, Thorlund K, Brok J, et al. Trial sequential analysis may establish when firm evidence is reached in cumulative meta-analysis. *Journal of clinical epidemiology* 2008;61(1):64-75. doi: 10.1016/j.jclinepi.2007.03.013 [published Online First: 2007/12/18]
10. Moher D, Liberati A, Tetzlaff J, et al. Preferred reporting items for systematic reviews and meta-analyses: the PRISMA statement. *BMJ (Clinical research*

- 1  
2  
3 ed) 2009;339:b2535. doi: 10.1136/bmj.b2535 [published Online First:  
4 2009/07/23]
- 5 11. Higgins JP, Altman DG, Gotzsche PC, et al. The Cochrane Collaboration's tool for  
6 assessing risk of bias in randomised trials. *BMJ (Clinical research ed)*  
7 2011;343:d5928. doi: 10.1136/bmj.d5928 [published Online First:  
8 2011/10/20]
- 9 12. Schunemann HJ, Oxman AD, Brozek J, et al. Grading quality of evidence and  
10 strength of recommendations for diagnostic tests and strategies. *BMJ*  
11 *(Clinical research ed)* 2008;336(7653):1106-10. doi:  
12 10.1136/bmj.39500.677199.AE [published Online First: 2008/05/17]
- 13 13. Faglia E, Manuela M, Antonella Q, et al. Risk reduction of cardiac events by  
14 screening of unknown asymptomatic coronary artery disease in subjects  
15 with type 2 diabetes mellitus at high cardiovascular risk: an open-label  
16 randomized pilot study. *American heart journal* 2005;149(2):e1-6. doi:  
17 10.1016/j.ahj.2004.07.027 [published Online First: 2005/04/23]
- 18 14. Lievre MM, Moulin P, Thivolet C, et al. Detection of silent myocardial ischemia  
19 in asymptomatic patients with diabetes: results of a randomized trial and  
20 meta-analysis assessing the effectiveness of systematic screening. *Trials*  
21 2011;12:23. doi: 10.1186/1745-6215-12-23 [published Online First:  
22 2011/01/29]
- 23 15. Turrini F, Scarlini S, Mannucci C, et al. Does coronary Atherosclerosis Deserve  
24 to be Diagnosed early in Diabetic patients? The DADDY-D trial. Screening  
25 diabetic patients for unknown coronary disease. *European journal of*  
26 *internal medicine* 2015;26(6):407-13. doi: 10.1016/j.ejim.2015.05.006  
27 [published Online First: 2015/06/11]
- 28 16. Guyatt GH, Oxman AD, Kunz R, et al. Incorporating considerations of resources  
29 use into grading recommendations. *BMJ (Clinical research ed)*  
30 2008;336(7654):1170-3. doi: 10.1136/bmj.39504.506319.80 [published  
31 Online First: 2008/05/24]
- 32 17. Douglas PS, Hoffmann U, Patel MR, et al. Outcomes of Anatomical versus  
33 Functional Testing for Coronary Artery Disease. *New England Journal of*  
34 *Medicine* 2015;372(14):1291-300. doi: doi:10.1056/NEJMoa1415516
- 35 18. Farkouh ME, Domanski M, Sleeper LA, et al. Strategies for Multivessel  
36 Revascularization in Patients with Diabetes. *New England Journal of*  
37 *Medicine* 2012;367(25):2375-84. doi: doi:10.1056/NEJMoa1211585
- 38 19. Celeng C, Maurovich-Horvat P, Ghoshhajra BB, et al. Prognostic Value of  
39 Coronary Computed Tomography Angiography in Patients With Diabetes: A  
40 Meta-analysis. *Diabetes care* 2016;39(7):1274-80. doi: 10.2337/dc16-0281  
41 [published Online First: 2016/06/23]
- 42 20. Sipahi I, Akay MH, Dagdelen S, et al. Coronary artery bypass grafting vs  
43 percutaneous coronary intervention and long-term mortality and morbidity  
44 in multivessel disease: meta-analysis of randomized clinical trials of the  
45 arterial grafting and stenting era. *JAMA internal medicine* 2014;174(2):223-  
46 30. doi: 10.1001/jamainternmed.2013.12844 [published Online First:  
47 2013/12/04]
- 48  
49  
50  
51  
52  
53  
54  
55  
56  
57  
58  
59  
60

1  
2  
3  
4 Figure 1. Forest plot and TSA of screening versus no screening for all-cause mortality  
5  
6 outcome

7  
8 A) Forest plot for all-cause mortality. B) TSA for a relative risk reduction of 40%. The  
9  
10 continuous blue line represents the Z line (cumulative effect size), red dashed lines  
11  
12 represent the harm, benefit and futility boundaries and the estimated optimal sample  
13  
14 size adjusted to sample size and repeated analysis. The continuous black lines represent  
15  
16 the conventional confidence intervals.  
17  
18  
19  
20  
21  
22  
23  
24  
25  
26  
27  
28  
29  
30  
31  
32  
33  
34  
35  
36  
37  
38  
39  
40  
41  
42  
43  
44  
45  
46  
47  
48  
49  
50  
51  
52  
53  
54  
55  
56  
57  
58  
59  
60

1  
2  
3 Figure 2. Forest plot and TSA of screening versus no screening for cardiac events  
4  
5 outcome

6  
7 A) Forest plot for all-cause mortality. B) TSA for a relative risk reduction of 40%. The  
8  
9 continuous blue line represents the Z line (cumulative effect size), red dashed lines  
10  
11 represent the harm, benefit and futility boundaries and the estimated optimal sample  
12  
13 size adjusted to sample size and repeated analysis. The continuous black lines represent  
14  
15 the conventional confidence intervals.  
16  
17  
18  
19  
20  
21  
22  
23  
24  
25  
26  
27  
28  
29  
30  
31  
32  
33  
34  
35  
36  
37  
38  
39  
40  
41  
42  
43  
44  
45  
46  
47  
48  
49  
50  
51  
52  
53  
54  
55  
56  
57  
58  
59  
60



1  
2  
3  
4  
5  
6  
7  
8  
9  
10  
11  
12  
13  
14  
15  
16  
17  
18  
19  
20  
21  
22  
23  
24  
25  
26  
27  
28  
29  
30  
31  
32  
33  
34  
35  
36  
37  
38  
39  
40  
41  
42  
43  
44  
45  
46  
47  
48  
49  
50  
51  
52  
53  
54  
55  
56  
57  
58  
59  
60

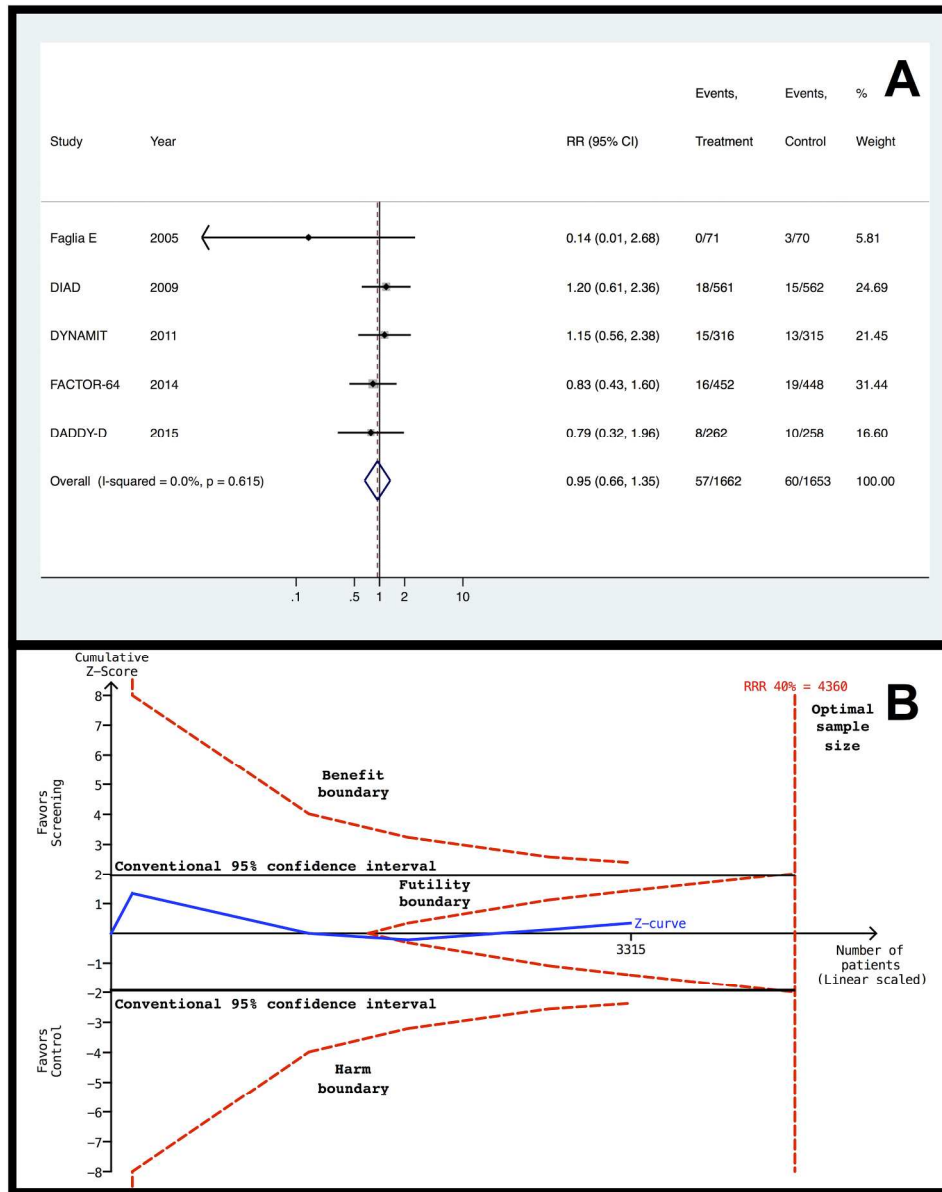

Figure 1. Forest plot and TSA of screening versus no screening for all-cause mortality outcome. A) Forest plot for all-cause mortality. B) TSA for a relative risk reduction of 40%. The continuous blue line represents the Z line (cumulative effect size), red dashed lines represent the harm, benefit and futility boundaries and the estimated optimal sample size adjusted to sample size and repeated analysis. The continuous black lines represent the conventional confidence intervals.

218x274mm (300 x 300 DPI)

1  
2  
3  
4  
5  
6  
7  
8  
9  
10  
11  
12  
13  
14  
15  
16  
17  
18  
19  
20  
21  
22  
23  
24  
25  
26  
27  
28  
29  
30  
31  
32  
33  
34  
35  
36  
37  
38  
39  
40  
41  
42  
43  
44  
45  
46  
47  
48  
49  
50  
51  
52  
53  
54  
55  
56  
57  
58  
59  
60

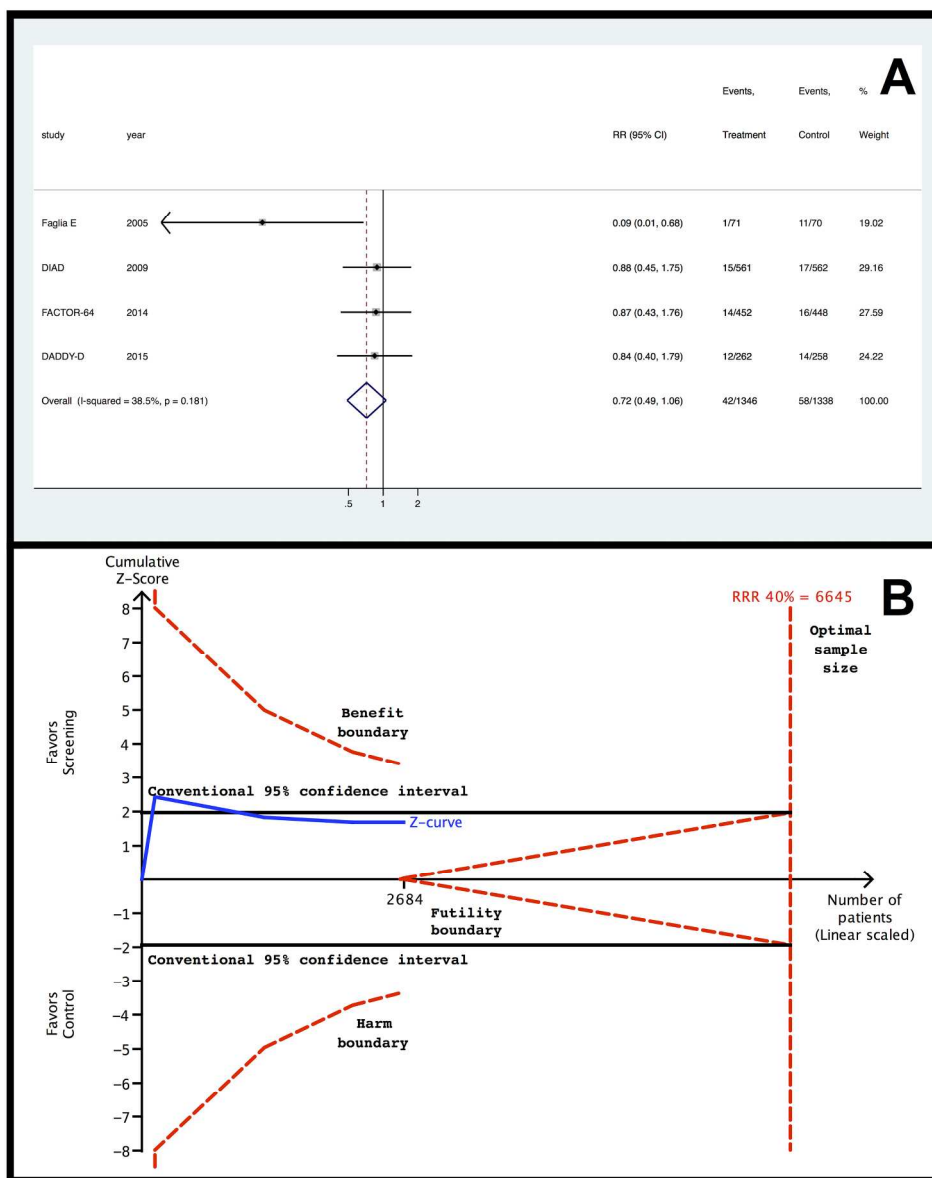

Figure 2. Forest plot and TSA of screening versus no screening for cardiac events outcome† A) Forest plot for all-cause mortality. B) TSA for a relative risk reduction of 40%. The continuous blue line represents the Z line (cumulative effect size), red dashed lines represent the harm, benefit and futility boundaries and the estimated optimal sample size adjusted to sample size and repeated analysis. The continuous black lines represent the conventional confidence intervals.

218x275mm (300 x 300 DPI)

Figure 1. Study flowchart.



Figure 2. Risk of bias across studies.

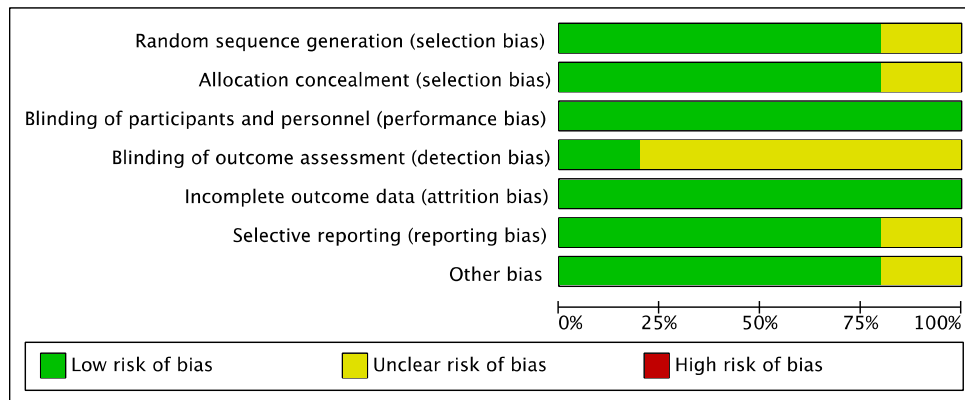

For peer review only

1  
2  
3  
4  
5  
6  
7  
8  
9  
10  
11  
12  
13  
14  
15  
16  
17  
18  
19  
20  
21  
22  
23  
24  
25  
26  
27  
28  
29  
30  
31  
32  
33  
34  
35  
36  
37  
38  
39  
40  
41  
42  
43  
44  
45  
46  
47  
48  
49  
50  
51  
52  
53  
54  
55  
56  
57  
58  
59  
60

Figure 3. Risk of bias for individual studies.

|           | Random sequence generation (selection bias) | Allocation concealment (selection bias) | Blinding of participants and personnel (performance bias) | Blinding of outcome assessment (detection bias) | Incomplete outcome data (attrition bias) | Selective reporting (reporting bias) | Other bias |
|-----------|---------------------------------------------|-----------------------------------------|-----------------------------------------------------------|-------------------------------------------------|------------------------------------------|--------------------------------------|------------|
| DADDY-D   | +                                           | +                                       | +                                                         | ?                                               | +                                        | +                                    | +          |
| DIAD      | ?                                           | +                                       | +                                                         | ?                                               | +                                        | +                                    | +          |
| DYNAMIT   | +                                           | +                                       | +                                                         | +                                               | +                                        | ?                                    | +          |
| FACTOR-64 | +                                           | ?                                       | +                                                         | ?                                               | +                                        | +                                    | +          |
| Faglia    | +                                           | +                                       | +                                                         | ?                                               | +                                        | +                                    | ?          |

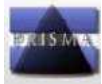

# PRISMA 2009 Checklist

1  
2  
3  
4  
5  
6  
7  
8  
9  
10  
11  
12  
13  
14  
15  
16  
17  
18  
19  
20  
21  
22  
23  
24  
25  
26  
27  
28  
29  
30  
31  
32  
33  
34  
35  
36  
37  
38  
39  
40  
41  
42  
43  
44  
45  
46  
47  
48  
49

| Section/topic                      | #  | Checklist item                                                                                                                                                                                                                                                                                              | Reported on page # |
|------------------------------------|----|-------------------------------------------------------------------------------------------------------------------------------------------------------------------------------------------------------------------------------------------------------------------------------------------------------------|--------------------|
| <b>TITLE</b>                       |    |                                                                                                                                                                                                                                                                                                             |                    |
| Title                              | 1  | Identify the report as a systematic review, meta-analysis, or both.                                                                                                                                                                                                                                         | 1                  |
| <b>ABSTRACT</b>                    |    |                                                                                                                                                                                                                                                                                                             |                    |
| Structured summary                 | 2  | Provide a structured summary including, as applicable: background; objectives; data sources; study eligibility criteria, participants, and interventions; study appraisal and synthesis methods; results; limitations; conclusions and implications of key findings; systematic review registration number. | 2                  |
| <b>INTRODUCTION</b>                |    |                                                                                                                                                                                                                                                                                                             |                    |
| Rationale                          | 3  | Describe the rationale for the review in the context of what is already known.                                                                                                                                                                                                                              | 4                  |
| Objectives                         | 4  | Provide an explicit statement of questions being addressed with reference to participants, interventions, comparisons, outcomes, and study design (PICOS).                                                                                                                                                  | 5                  |
| <b>METHODS</b>                     |    |                                                                                                                                                                                                                                                                                                             |                    |
| Protocol and registration          | 5  | Indicate if a review protocol exists, if and where it can be accessed (e.g., Web address), and, if available, provide registration information including registration number.                                                                                                                               | 5                  |
| Eligibility criteria               | 6  | Specify study characteristics (e.g., PICOS, length of follow-up) and report characteristics (e.g., years considered, language, publication status) used as criteria for eligibility, giving rationale.                                                                                                      | 6                  |
| Information sources                | 7  | Describe all information sources (e.g., databases with dates of coverage, contact with study authors to identify additional studies) in the search and date last searched.                                                                                                                                  | 5                  |
| Search                             | 8  | Present full electronic search strategy for at least one database, including any limits used, such that it could be repeated.                                                                                                                                                                               | 5                  |
| Study selection                    | 9  | State the process for selecting studies (i.e., screening, eligibility, included in systematic review, and, if applicable, included in the meta-analysis).                                                                                                                                                   | 6                  |
| Data collection process            | 10 | Describe method of data extraction from reports (e.g., piloted forms, independently, in duplicate) and any processes for obtaining and confirming data from investigators.                                                                                                                                  | 6                  |
| Data items                         | 11 | List and define all variables for which data were sought (e.g., PICOS, funding sources) and any assumptions and simplifications made.                                                                                                                                                                       | 6                  |
| Risk of bias in individual studies | 12 | Describe methods used for assessing risk of bias of individual studies (including specification of whether this was done at the study or outcome level), and how this information is to be used in any data synthesis.                                                                                      | 6                  |
| Summary measures                   | 13 | State the principal summary measures (e.g., risk ratio, difference in means).                                                                                                                                                                                                                               | 6-7                |
| Synthesis of results               | 14 | Describe the methods of handling data and combining results of studies, if done, including measures of consistency (e.g., $I^2$ for each meta-analysis).                                                                                                                                                    | 6-7                |

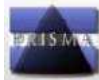

## PRISMA 2009 Checklist

Page 1 of 2

| Section/topic                 | #  | Checklist item                                                                                                                                                                                           | Reported on page #      |
|-------------------------------|----|----------------------------------------------------------------------------------------------------------------------------------------------------------------------------------------------------------|-------------------------|
| Risk of bias across studies   | 15 | Specify any assessment of risk of bias that may affect the cumulative evidence (e.g., publication bias, selective reporting within studies).                                                             | 6                       |
| Additional analyses           | 16 | Describe methods of additional analyses (e.g., sensitivity or subgroup analyses, meta-regression), if done, indicating which were pre-specified.                                                         | 7-8                     |
| <b>RESULTS</b>                |    |                                                                                                                                                                                                          |                         |
| Study selection               | 17 | Give numbers of studies screened, assessed for eligibility, and included in the review, with reasons for exclusions at each stage, ideally with a flow diagram.                                          | 8 and eFigure1          |
| Study characteristics         | 18 | For each study, present characteristics for which data were extracted (e.g., study size, PICOS, follow-up period) and provide the citations.                                                             | Table 1                 |
| Risk of bias within studies   | 19 | Present data on risk of bias of each study and, if available, any outcome level assessment (see item 12).                                                                                                | eFigure 3               |
| Results of individual studies | 20 | For all outcomes considered (benefits or harms), present, for each study: (a) simple summary data for each intervention group (b) effect estimates and confidence intervals, ideally with a forest plot. | 8-9 and Figure 1 and 2  |
| Synthesis of results          | 21 | Present results of each meta-analysis done, including confidence intervals and measures of consistency.                                                                                                  | 8-9                     |
| Risk of bias across studies   | 22 | Present results of any assessment of risk of bias across studies (see Item 15).                                                                                                                          | eFigure 2               |
| Additional analysis           | 23 | Give results of additional analyses, if done (e.g., sensitivity or subgroup analyses, meta-regression [see Item 16]).                                                                                    | 8-9 and Figures 1 and 2 |
| <b>DISCUSSION</b>             |    |                                                                                                                                                                                                          |                         |
| Summary of evidence           | 24 | Summarize the main findings including the strength of evidence for each main outcome; consider their relevance to key groups (e.g., healthcare providers, users, and policy makers).                     | 9-10                    |
| Limitations                   | 25 | Discuss limitations at study and outcome level (e.g., risk of bias), and at review-level (e.g., incomplete retrieval of identified research, reporting bias).                                            | 11                      |
| Conclusions                   | 26 | Provide a general interpretation of the results in the context of other evidence, and implications for future research.                                                                                  | 10-11                   |
| <b>FUNDING</b>                |    |                                                                                                                                                                                                          |                         |
| Funding                       | 27 | Describe sources of funding for the systematic review and other support (e.g., supply of data); role of funders for the systematic review.                                                               | 12                      |



# PRISMA 2009 Checklist

1  
2  
3  
4  
5  
6  
7  
8  
9  
10  
11  
12  
13  
14  
15  
16  
17  
18  
19  
20  
21  
22  
23  
24  
25  
26  
27  
28  
29  
30  
31  
32  
33  
34  
35  
36  
37  
38  
39  
40  
41  
42  
43  
44  
45  
46  
47  
48  
49

doi:10.1371/journal.pmed1000097

For more information, visit: [www.prisma-statement.org](http://www.prisma-statement.org).

For peer review only
