# Supplementary material for: Screening for coronary artery disease in patients with type 2 diabetes: a meta-analysis and trial sequential analysis
Source: PubMed Central journal article supplement — BMJ Open. 2017 May 9;7(5):e015089. doi: 10.1136/bmjopen-2016-015089 (PMC5623378; doi:10.1136/bmjopen-2016-015089), 2017-05-09
Supplement: bmjopen-2016-015089supp001.pdf [file bmjopen-2016-015089supp001.pdf]

**Figure 1. Study flowchart.**

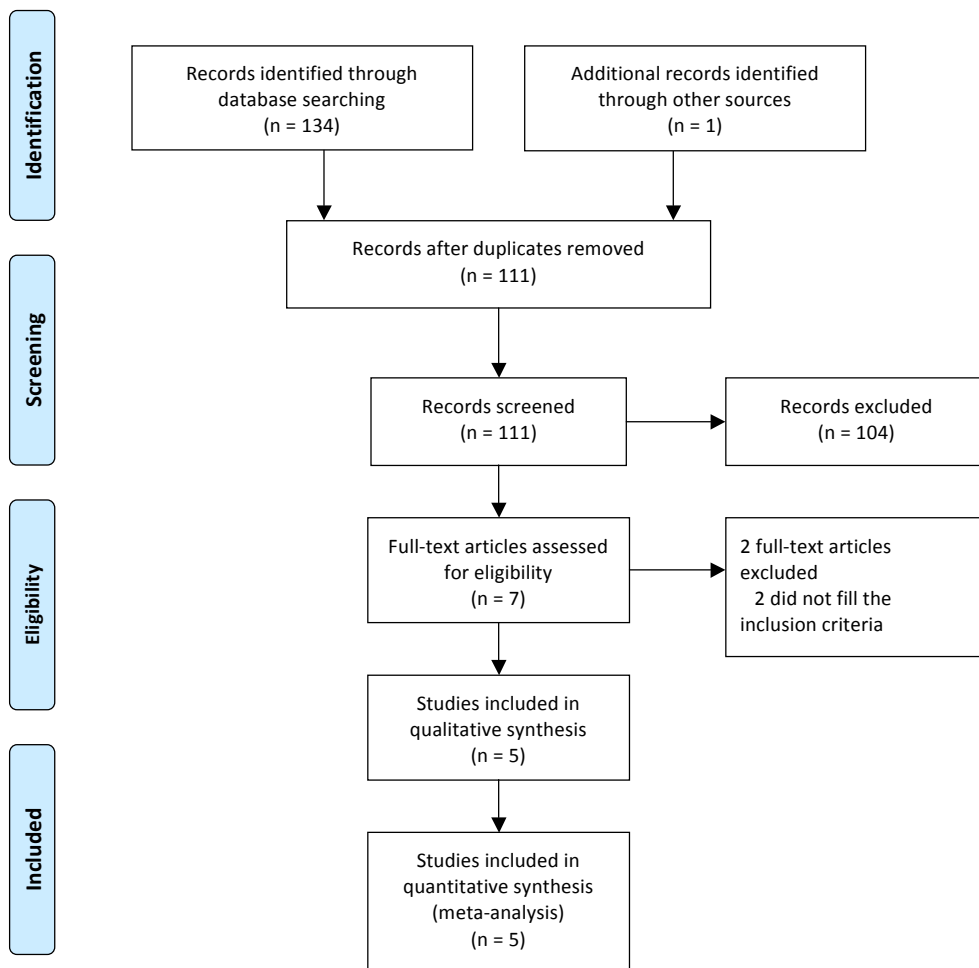

**Figure 2. Risk of bias across studies.**

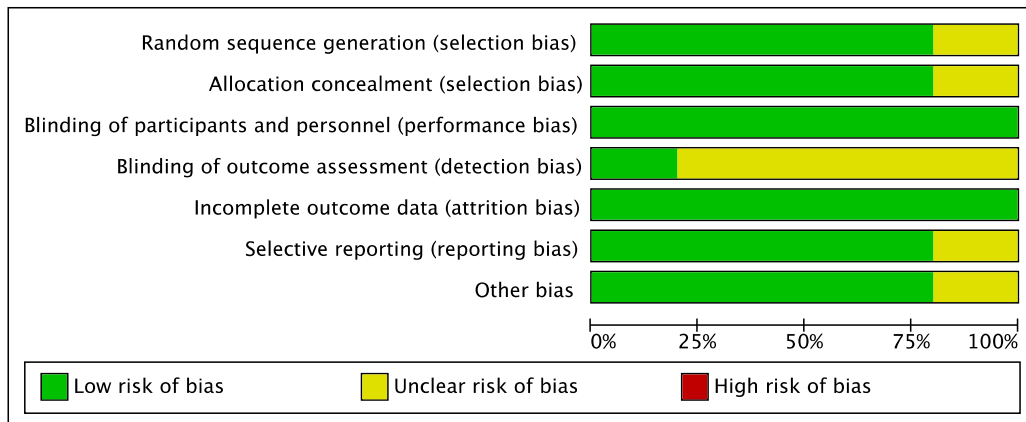

**Figure 3. Risk of bias for individual studies.**

|           | Random sequence generation (selection bias) | Allocation concealment (selection bias) | Blinding of participants and personnel (performance bias) | Blinding of outcome assessment (detection bias) | Incomplete outcome data (attrition bias) | Selective reporting (reporting bias) | Other bias |
|-----------|---------------------------------------------|-----------------------------------------|-----------------------------------------------------------|-------------------------------------------------|------------------------------------------|--------------------------------------|------------|
| DADDY-D   | +                                           | +                                       | +                                                         | ?                                               | +                                        | +                                    | +          |
| DIAD      | ?                                           | +                                       | +                                                         | ?                                               | +                                        | +                                    | +          |
| DYNAMIT   | +                                           | +                                       | +                                                         | +                                               | +                                        | ?                                    | +          |
| FACTOR-64 | +                                           | ?                                       | +                                                         | ?                                               | +                                        | +                                    | +          |
| Faglia    | +                                           | +                                       | +                                                         | ?                                               | +                                        | +                                    | ?          |
